# Supplementary material for: Reversible mitophagy drives metabolic suppression in diapausing beetles
Source: PubMed Central journal article supplement — Proc Natl Acad Sci U S A. 2022 Jul 19;119(30):e2201089119. doi: 10.1073/pnas.2201089119 (PMC9335217; doi:10.1073/pnas.2201089119), 2022-07-19
Supplement: pnas.2201089119.sd02.pdf [file pnas.2201089119.sd02.pdf]

# *Transmission Electron Micrographs Read Me*

The following file contains representative transmission electron micrographs from Lebenzon et al. (2022) submitted to *PNAS*

Details on each image can be found below the raw file.

e.g.

DFM3-grid1-a → Diapausing (D), flight muscle (FM) from individual “3”, section from grid1, first (a) image

C1-grid4-b → Control (C), from individual “4”, second (b) image

Control 1

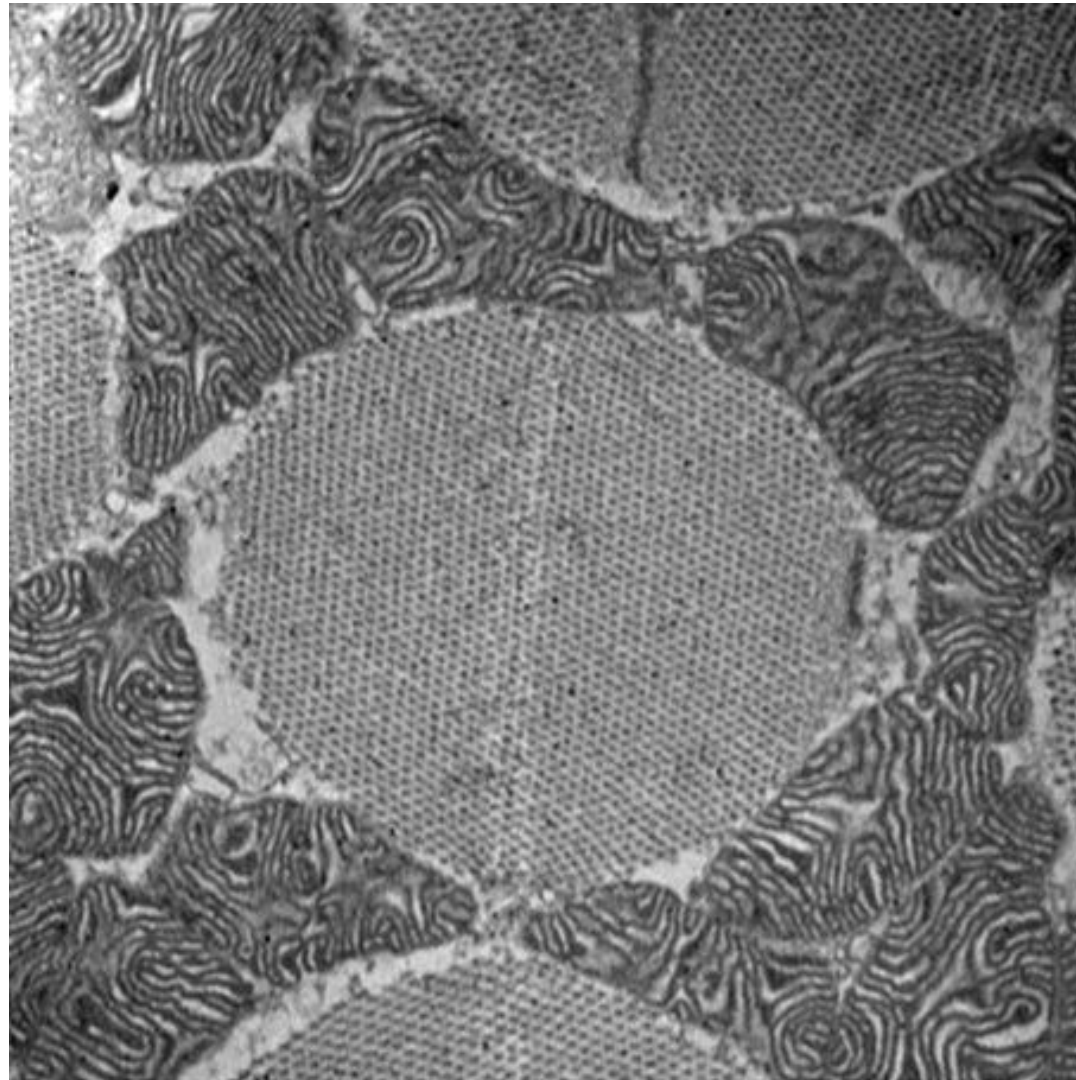

C1-b stained.tif

C1-b

Print Mag: 37400x @ 7.0 in

14:31 05/01/17

TEM Mode: Imaging

Microscopist: Jackie

500 nm

HV=100.0kV

Direct Mag: 19000x

Control, individual 1,  
grid 2

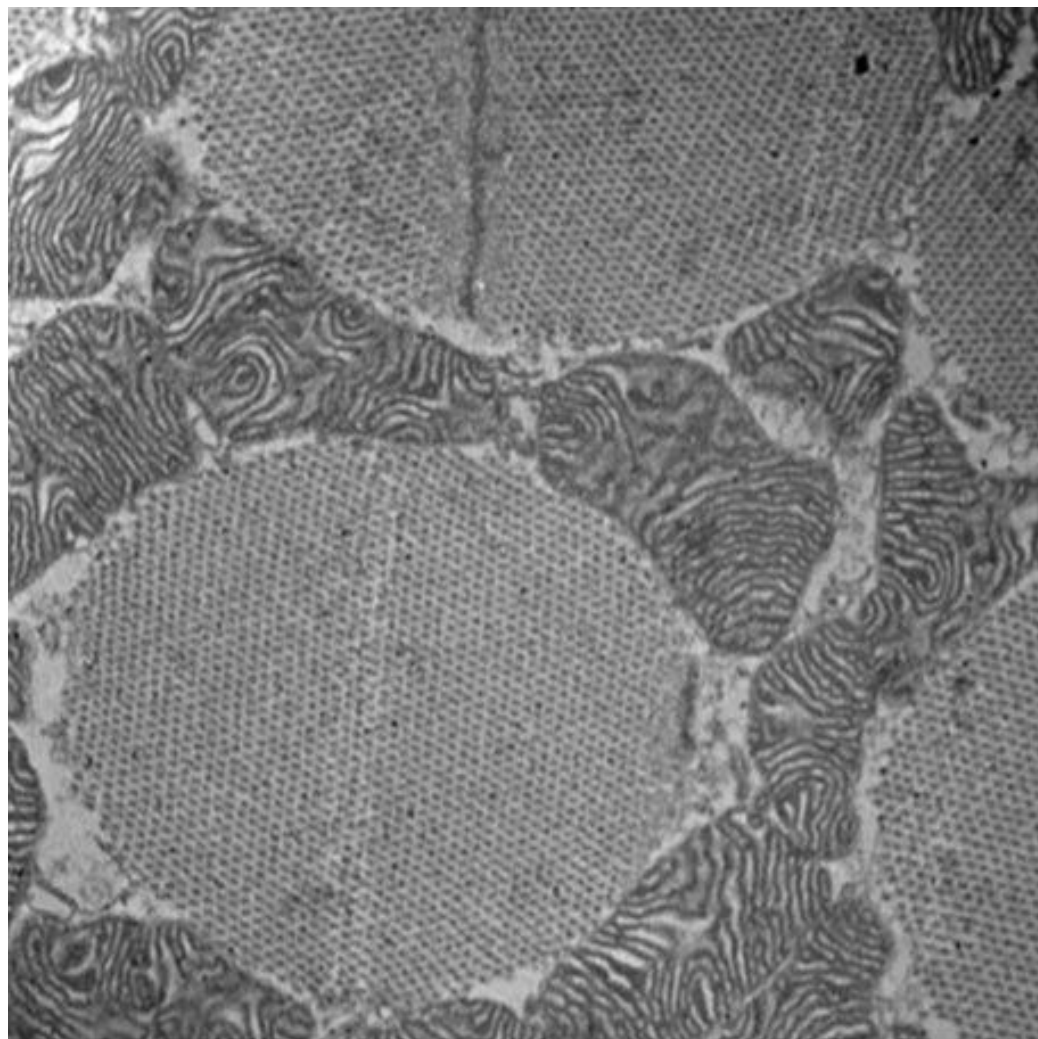

Cl-a stained.tif

Cl-a

Print Mag: 37400x @ 7.0 in

14:28 05/01/17

TEM Mode: Imaging

Microscopist: Jackie

500 nm

HV=100.0kV

Direct Mag: 19000x

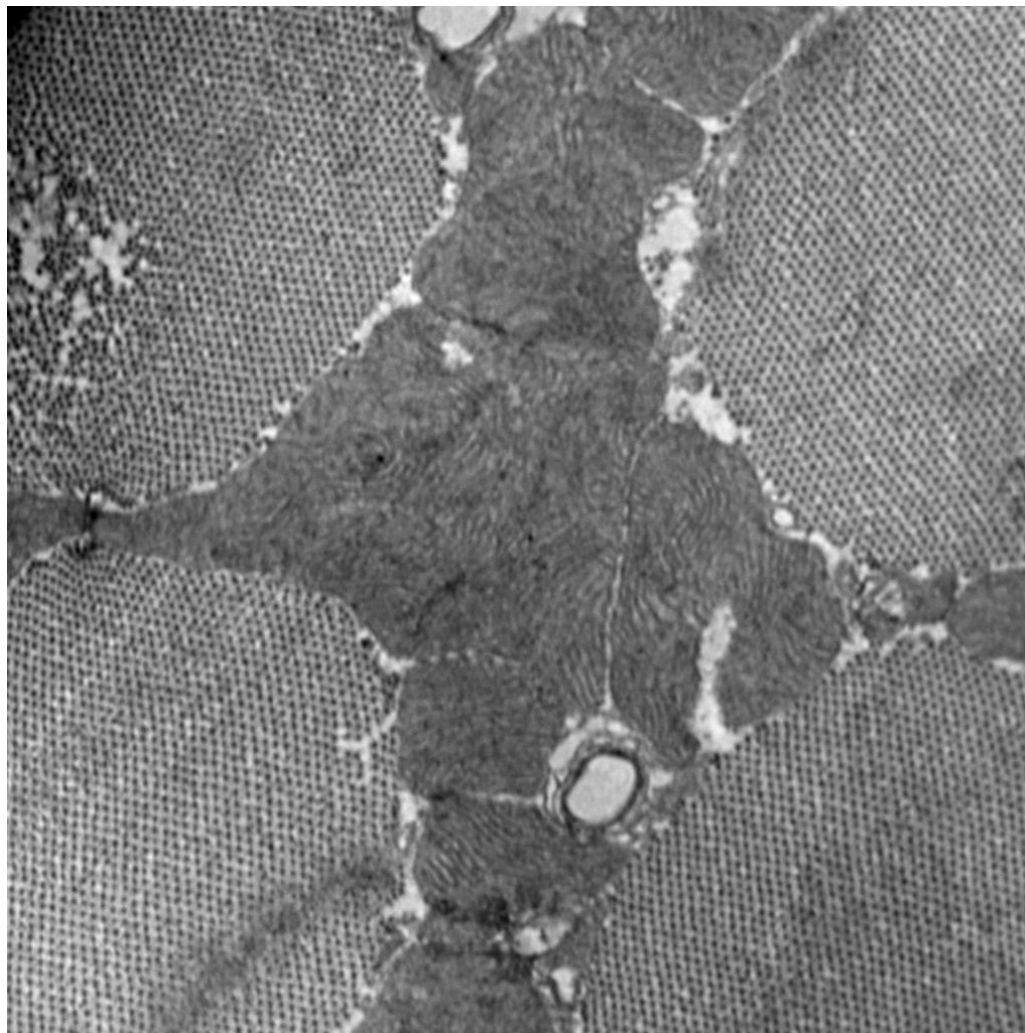

C1 grid2-a.tif  
C1 grid2-a  
Print Mag: 37400x @ 7.0 in  
13:31 06/20/17  
TEM Mode: Imaging  
Microscopist: Jackie

500 nm  
HV=60.0kV  
Direct Mag: 19000x

# Control 2

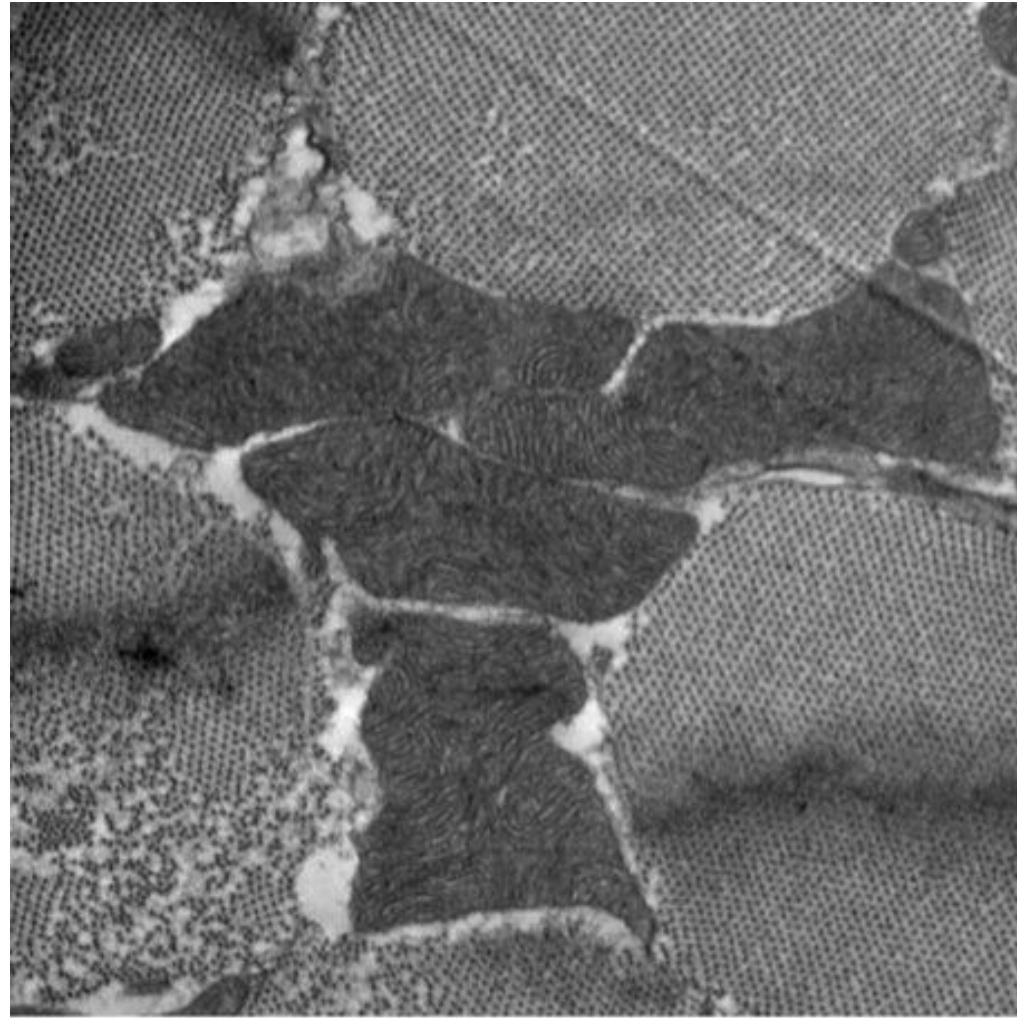

Cl grid4-c.tif  
Cl grid4-c  
Print Mag: 37400x @ 7.0 in  
13:20 06/20/17  
TEM Mode: Imaging  
Microscopist: Jackie

500 nm  
HV=60.0kV  
Direct Mag: 19000x

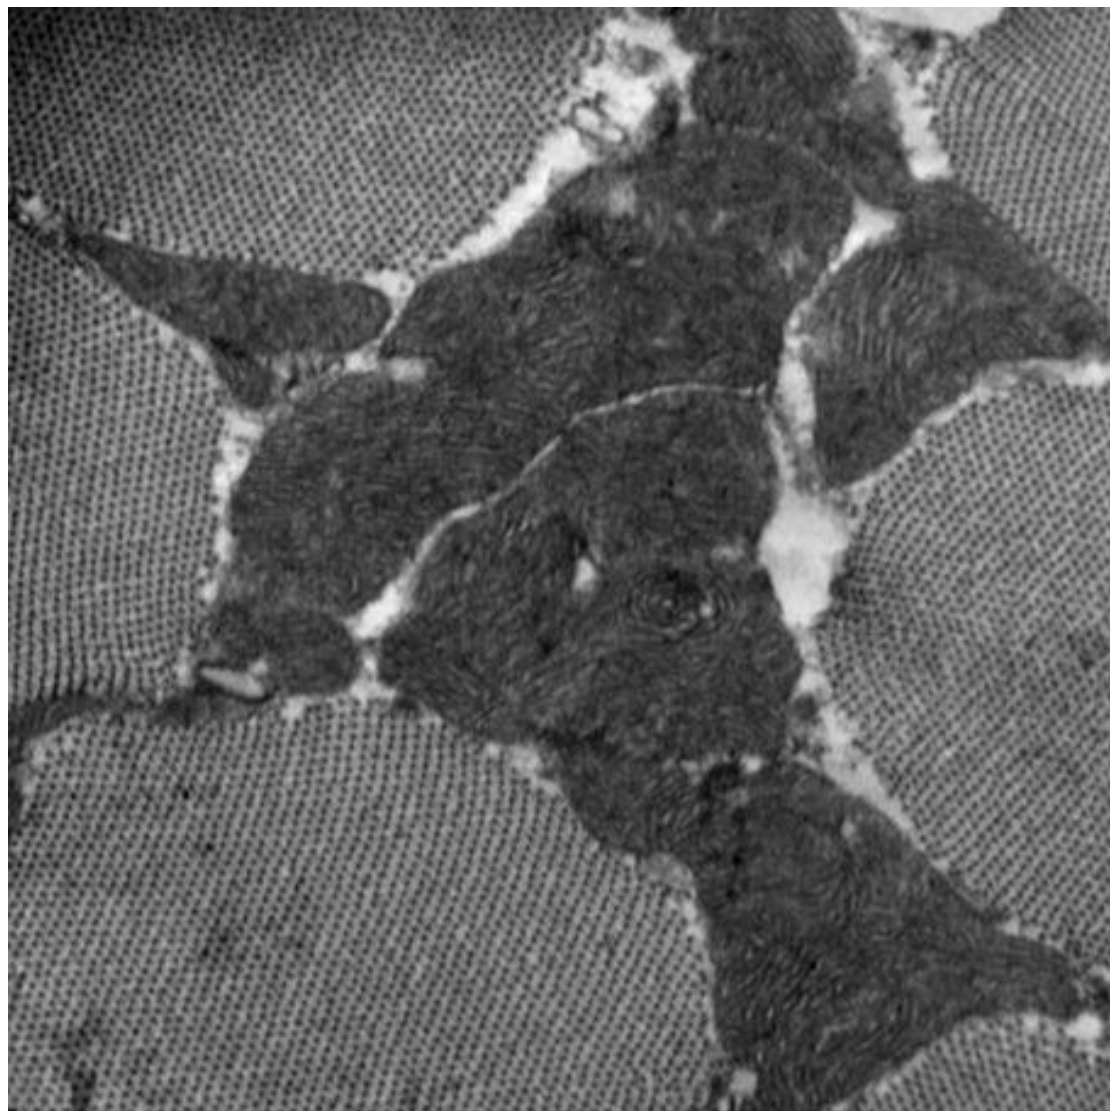

Cl grid4-b.tif  
Cl grid4-b  
Print Mag: 37400x @ 7.0 in  
13:18 06/20/17  
TEM Mode: Imaging  
Microscopist: Jackie

500 nm  
HV=60.0kV  
Direct Mag: 19000x



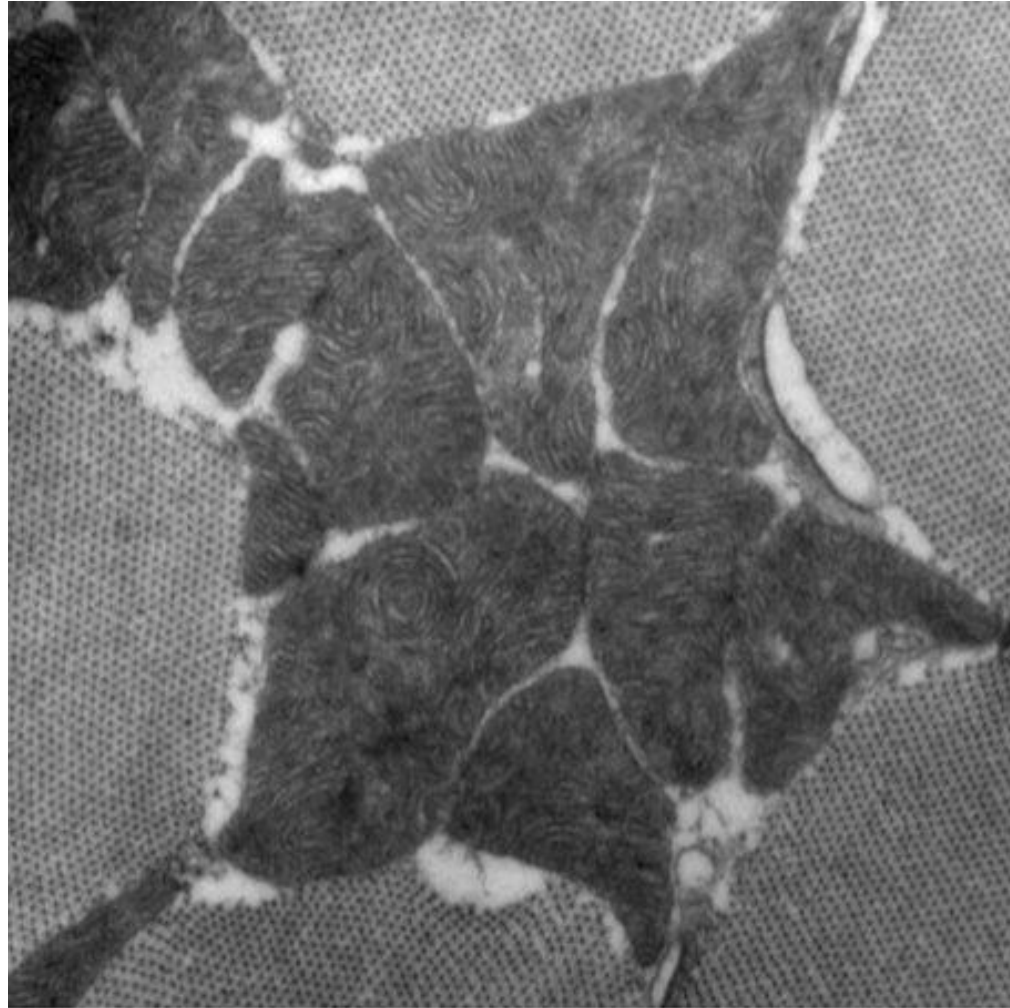

Cl grid6-d.tif  
Cl grid6-d  
Print Mag: 37400x @ 7.0 in  
14:00 06/20/17  
TEM Mode: Imaging  
Microscopist: Jackie

500 nm  
HV=60.0kV  
Direct Mag: 19000x

Control 3

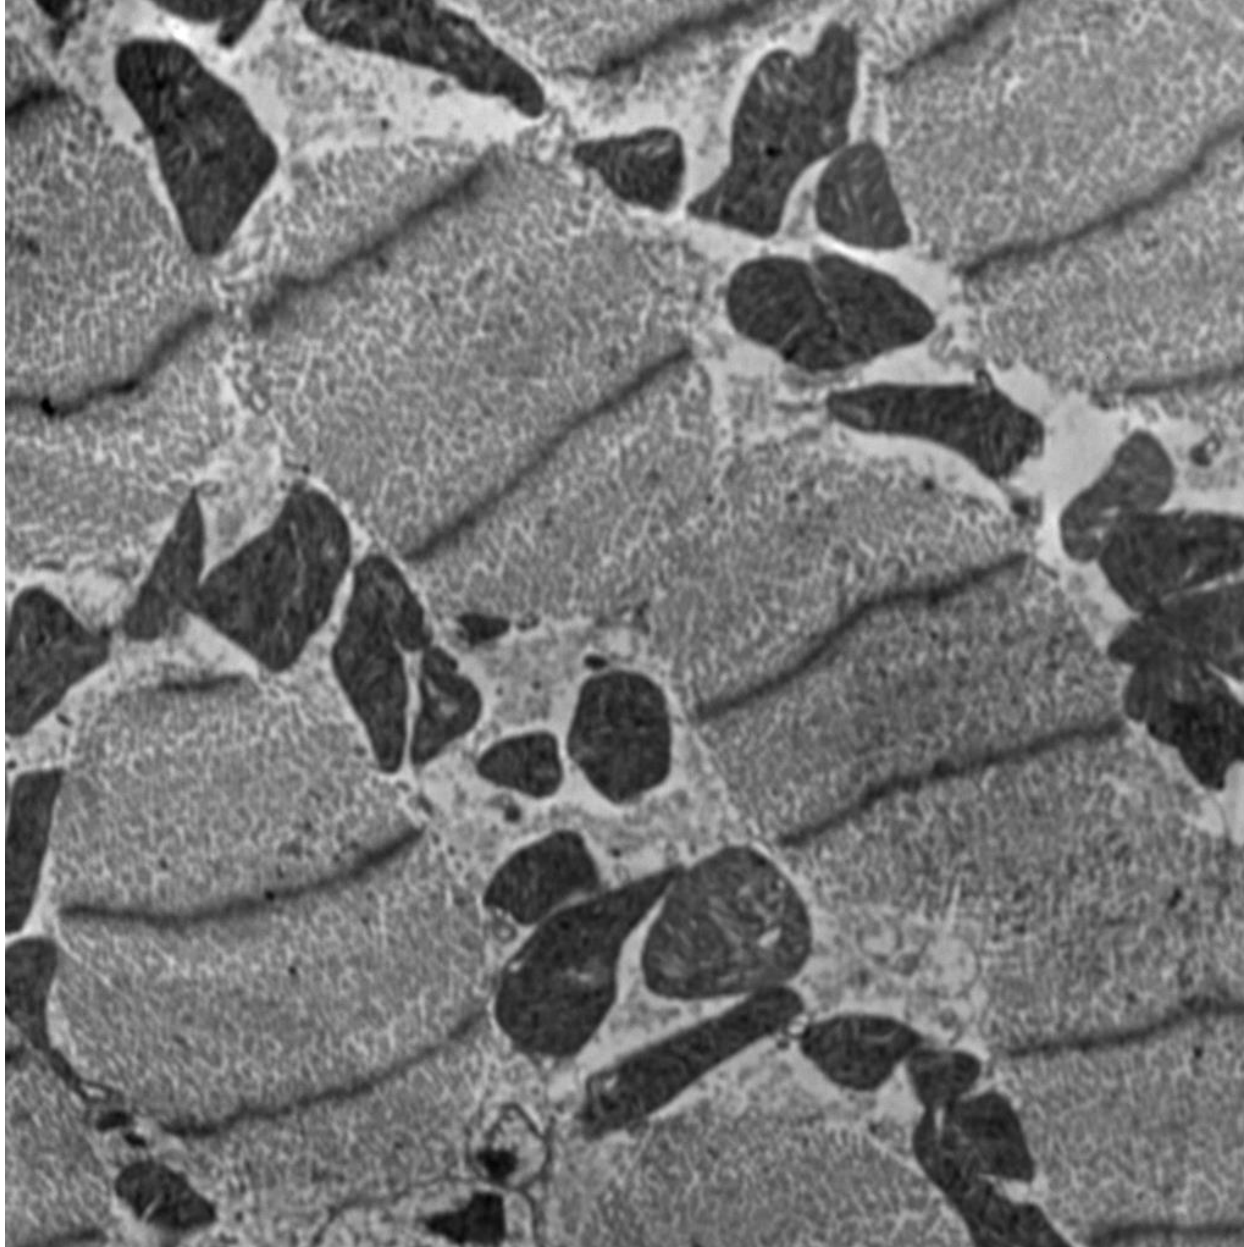

C3 grid1-c.tif

C3 grid1-c

Print Mag: 22x @ 7.0 in

13:28 06/02/17

TEM Mode: Imaging

Microscopist: Jackie

10 microns

HV=60.0kV

Direct Mag: 11x

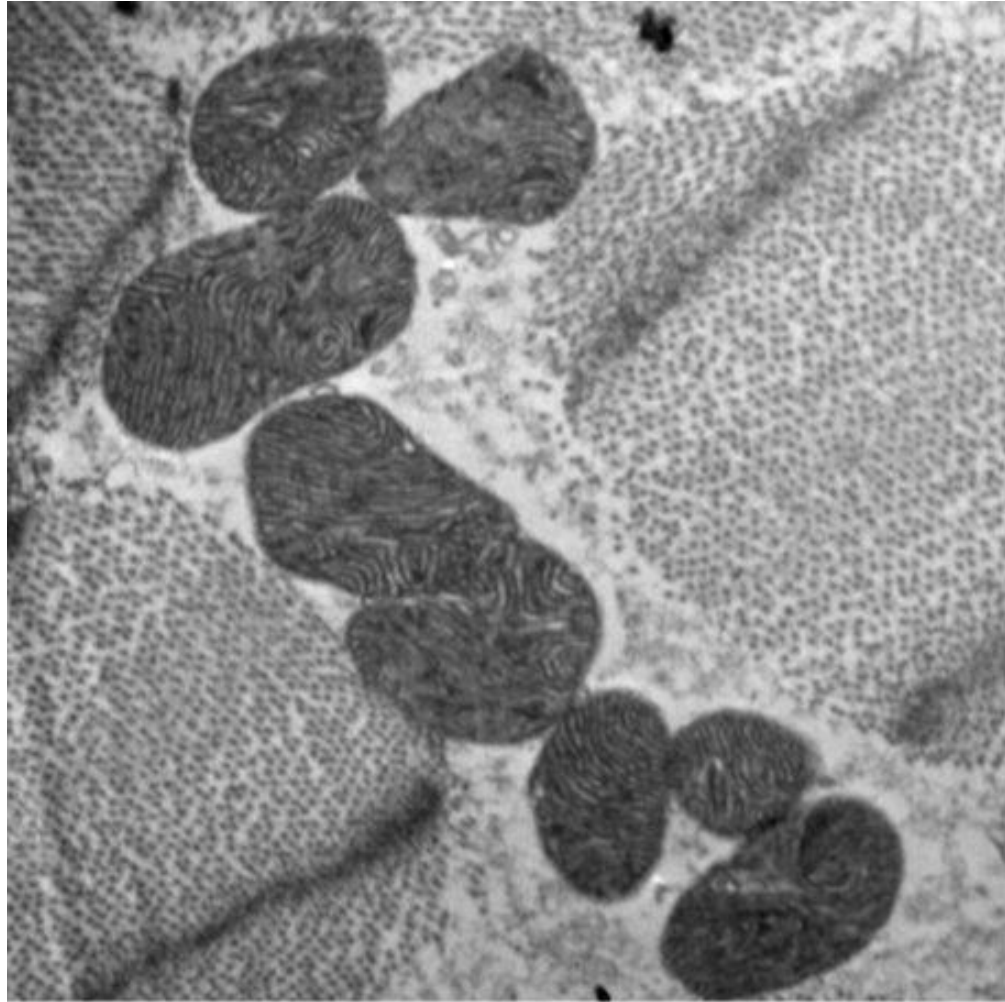

C3 grid1-f.tif  
C3 grid1-f  
Print Mag: 37400x @ 7.0 in  
13:43 06/02/17  
TEM Mode: Imaging  
Microscopist: Jackie

500 nm  
HV=60.0kV  
Direct Mag: 19000x

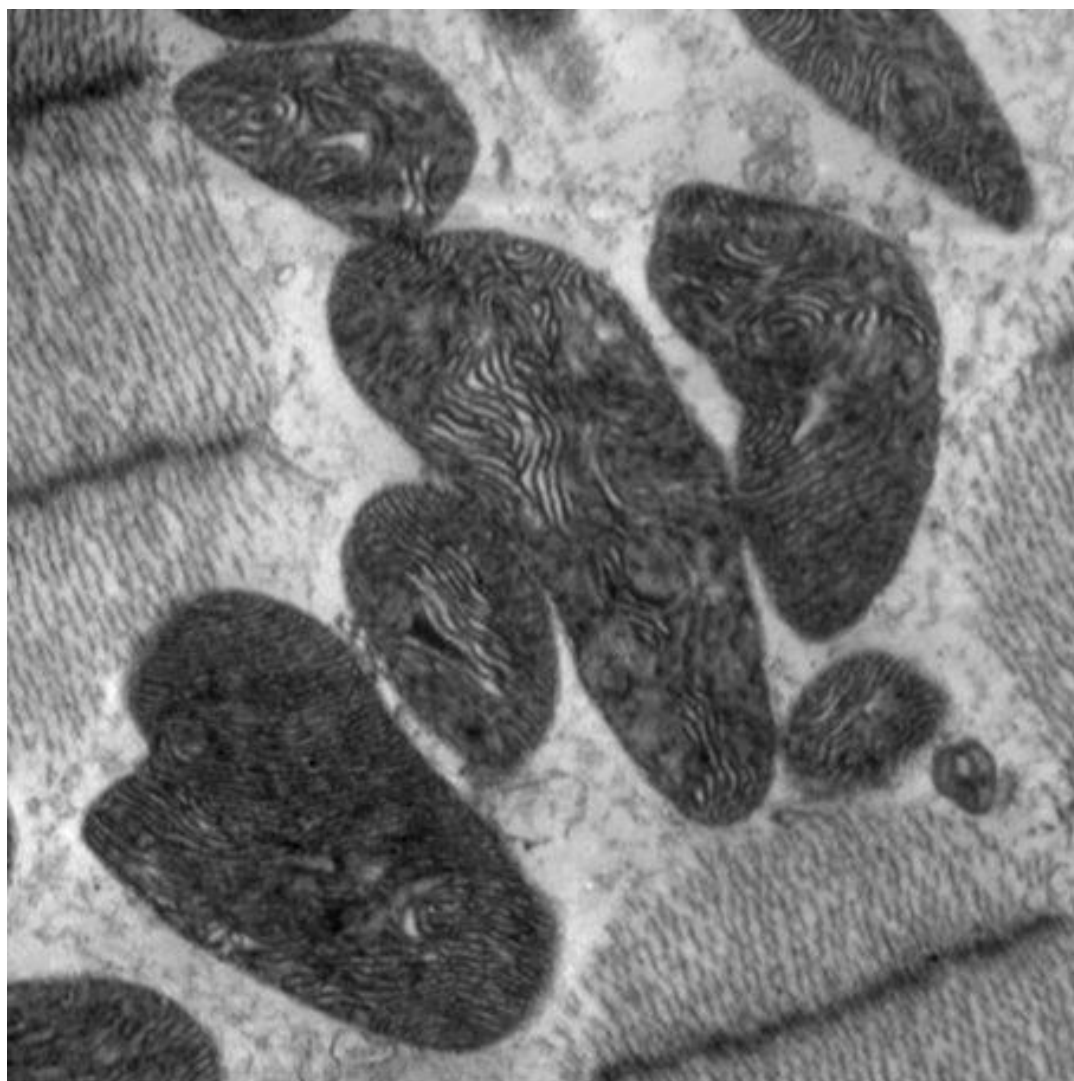

C3 grid2-c.tif  
C3 grid2-c  
Print Mag: 37400x @ 7.0 in  
14:10 06/02/17  
TEM Mode: Imaging  
Microscopist: Jackie

500 nm  
HV=60.0kV  
Direct Mag: 19000x

6 week 2

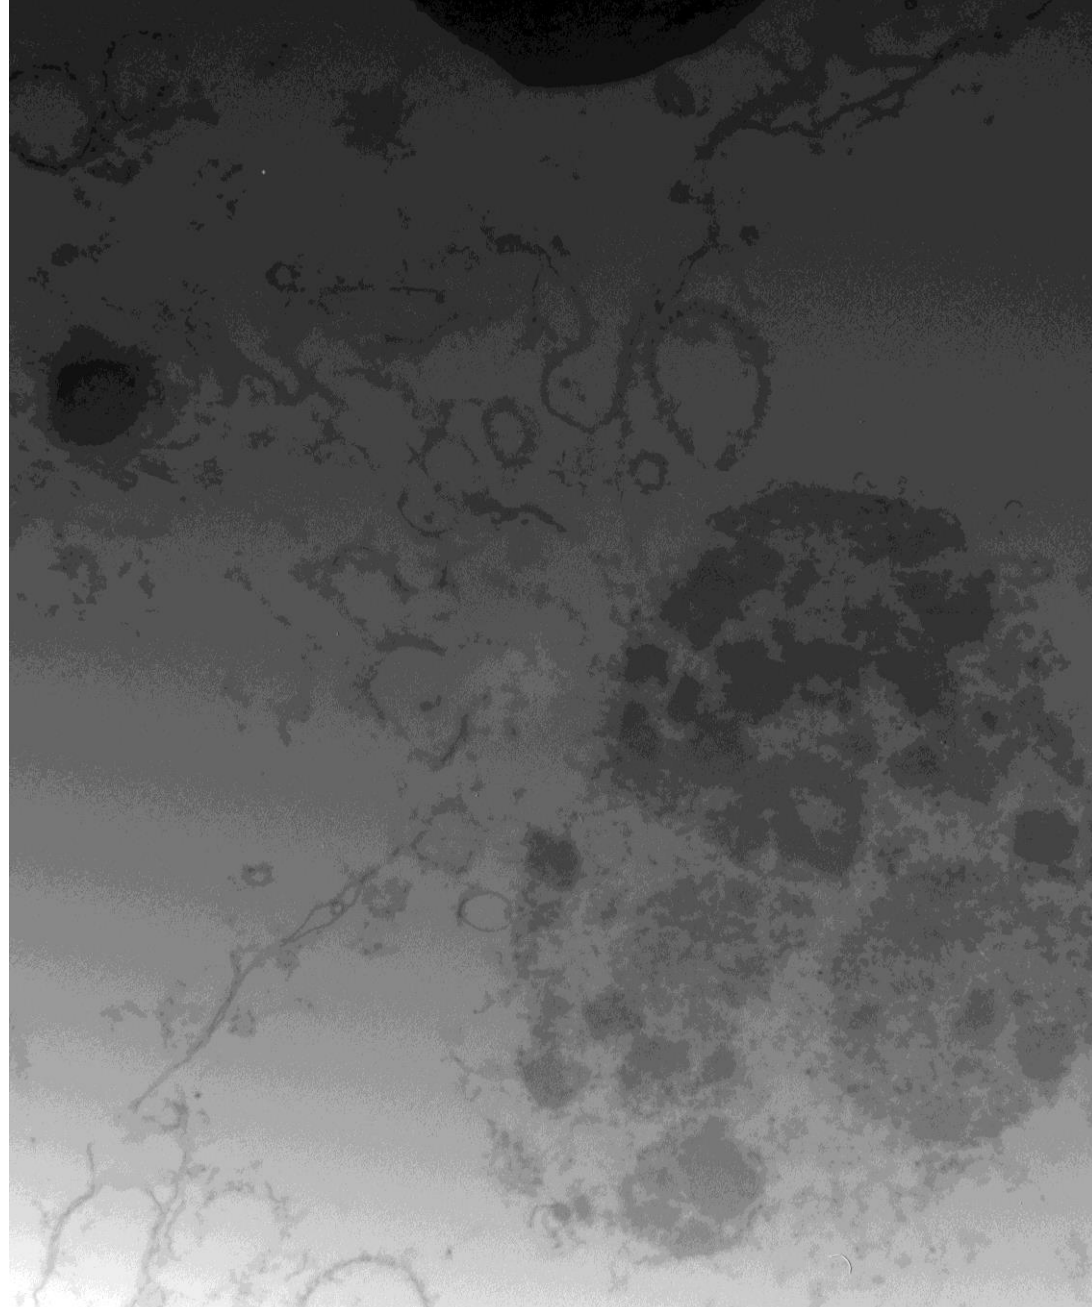

6FM2-grid1-c.tif  
Print Mag: 37x @ 7.0 in  
10:06 11/8/2018

10  $\mu$ m  
HV=80kV  
Direct Mag: 18 x

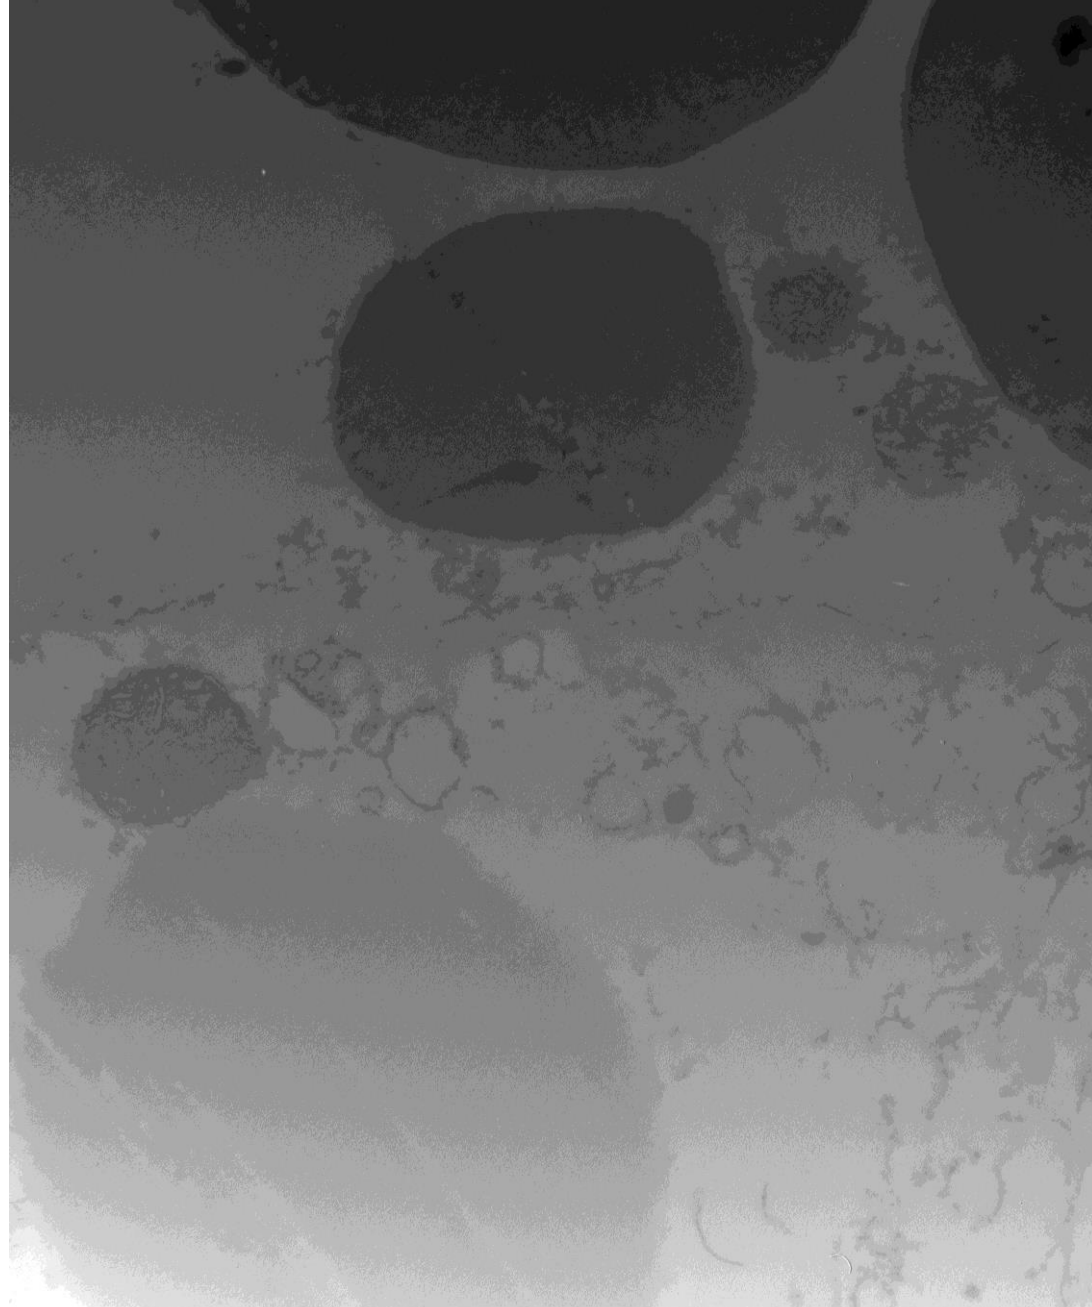

6FM2-grid1-b.tif  
Print Mag: 37x @ 7.0 in  
10:04 11/8/2018

| 10  $\mu$ m  
HV=80kV  
Direct Mag: 18 x



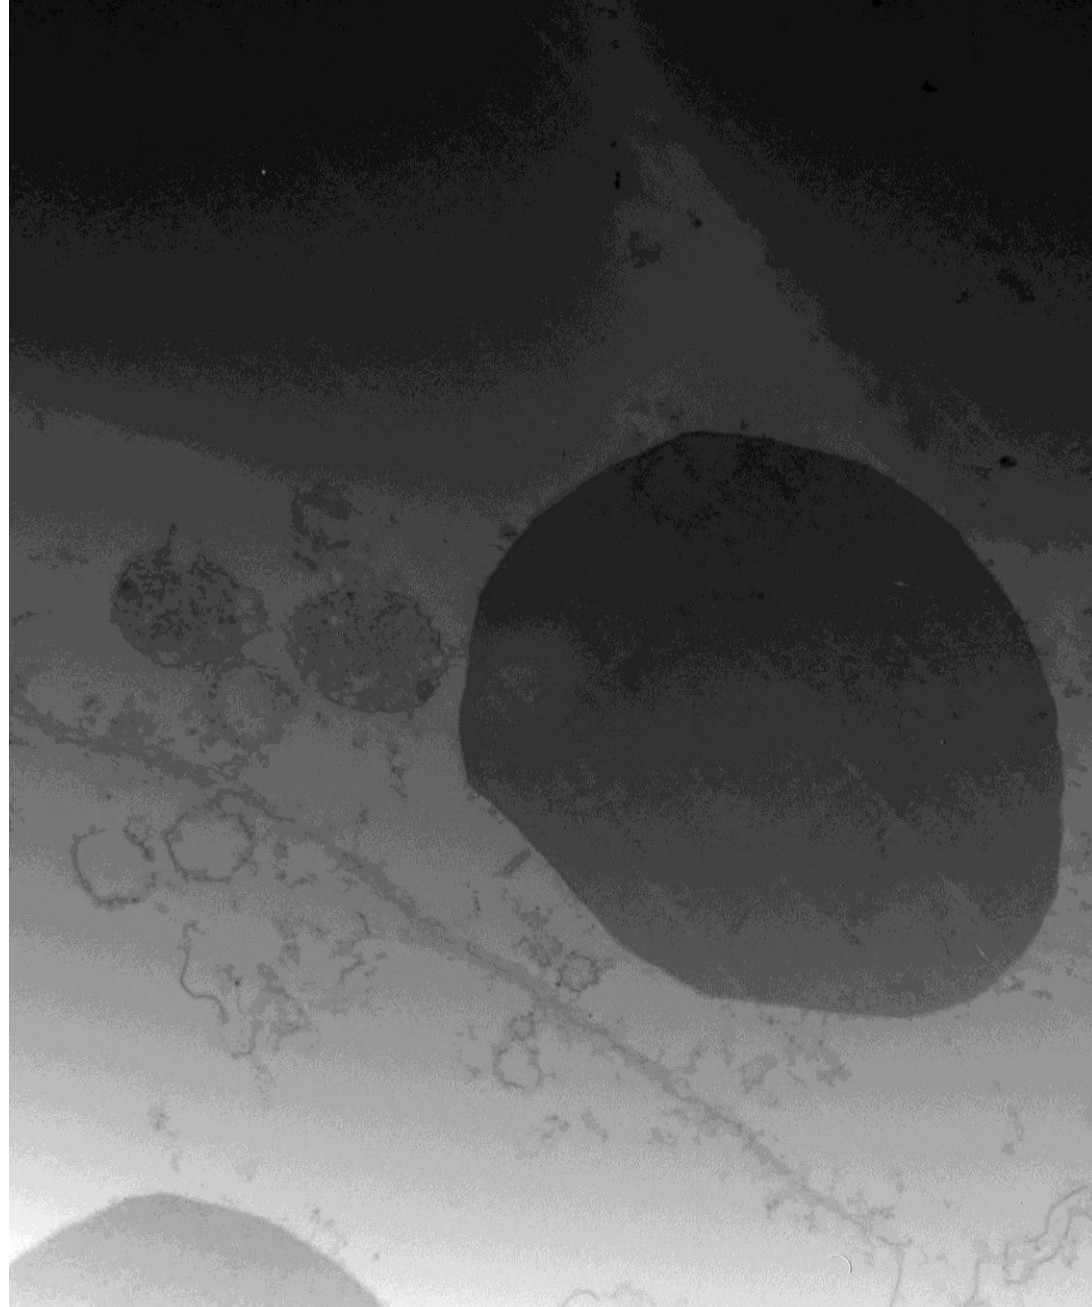

6FM2-grid1-a.tif  
Print Mag: 37x @ 7.0 in  
10:00 11/8/2018

10  $\mu$ m  
HV=80kV  
Direct Mag: 18 x

6 week 4

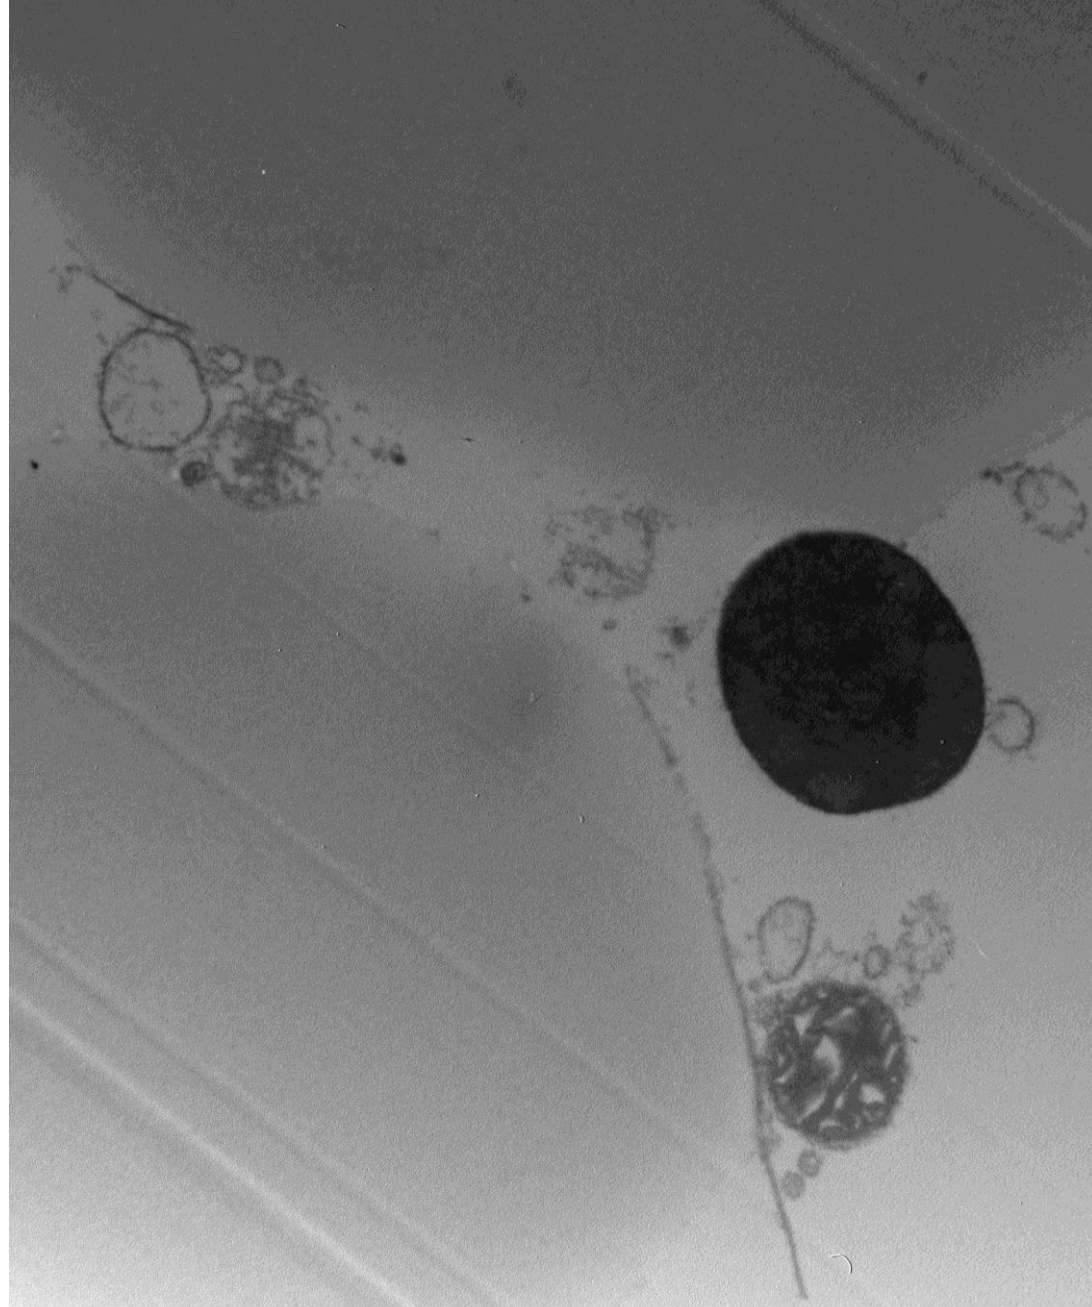

6FM4-grid5-d.tif  
Print Mag: 37x @ 7.0 in  
10:45 11/13/2018

10 μm  
HV=80kV  
Direct Mag: 18 x

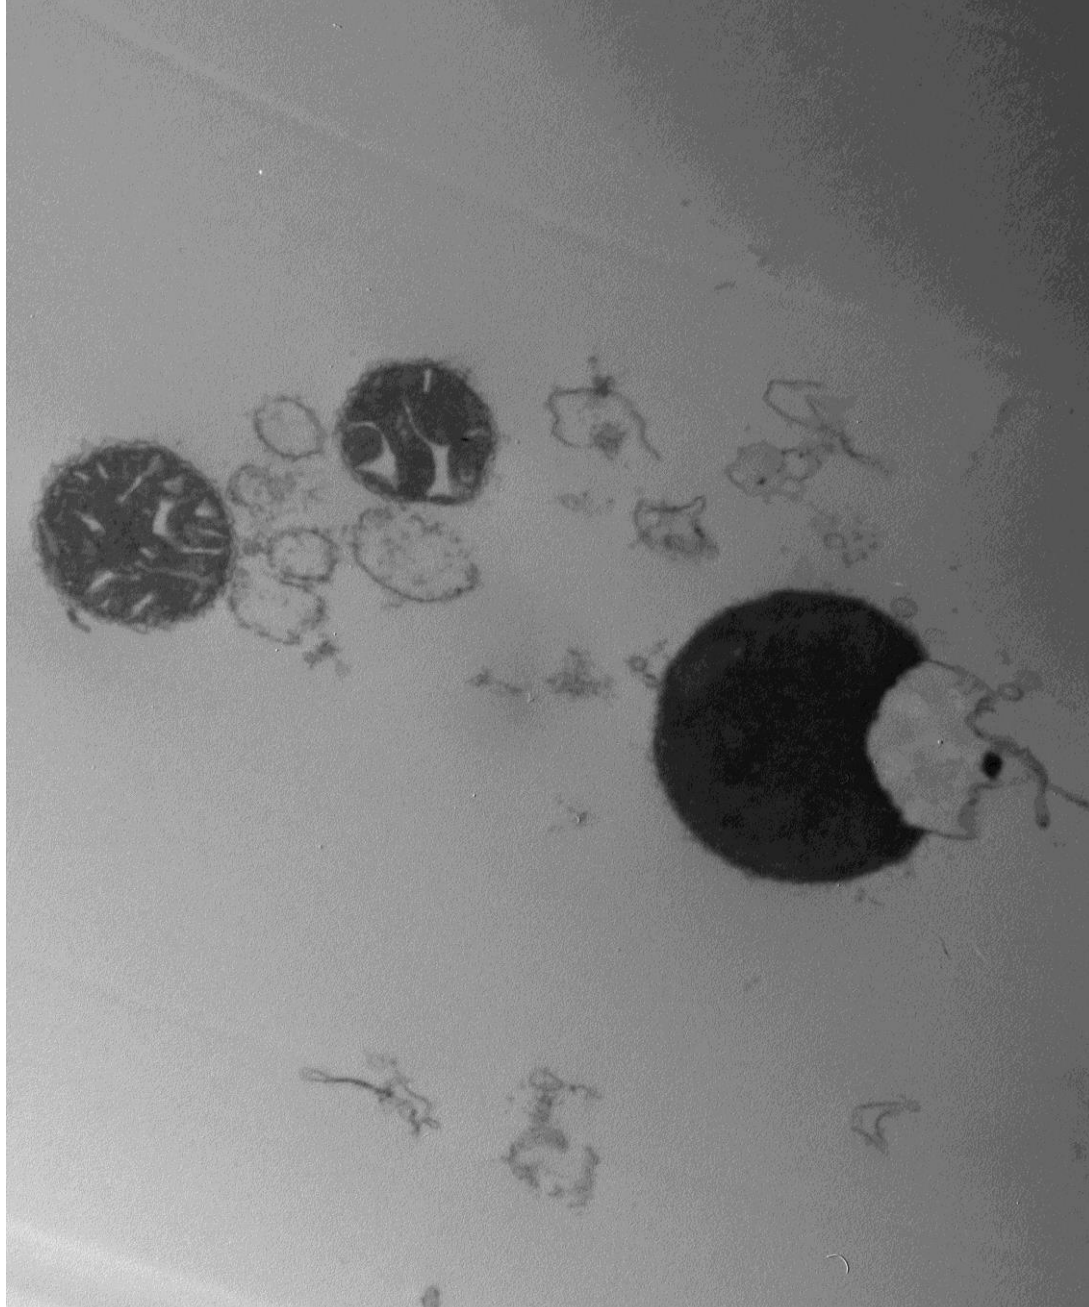

6FM4-grid5-c.tif  
Print Mag: 37x @ 7.0 in  
10:43 11/13/2018

10  $\mu$ m  
HV=80kV  
Direct Mag: 18 x

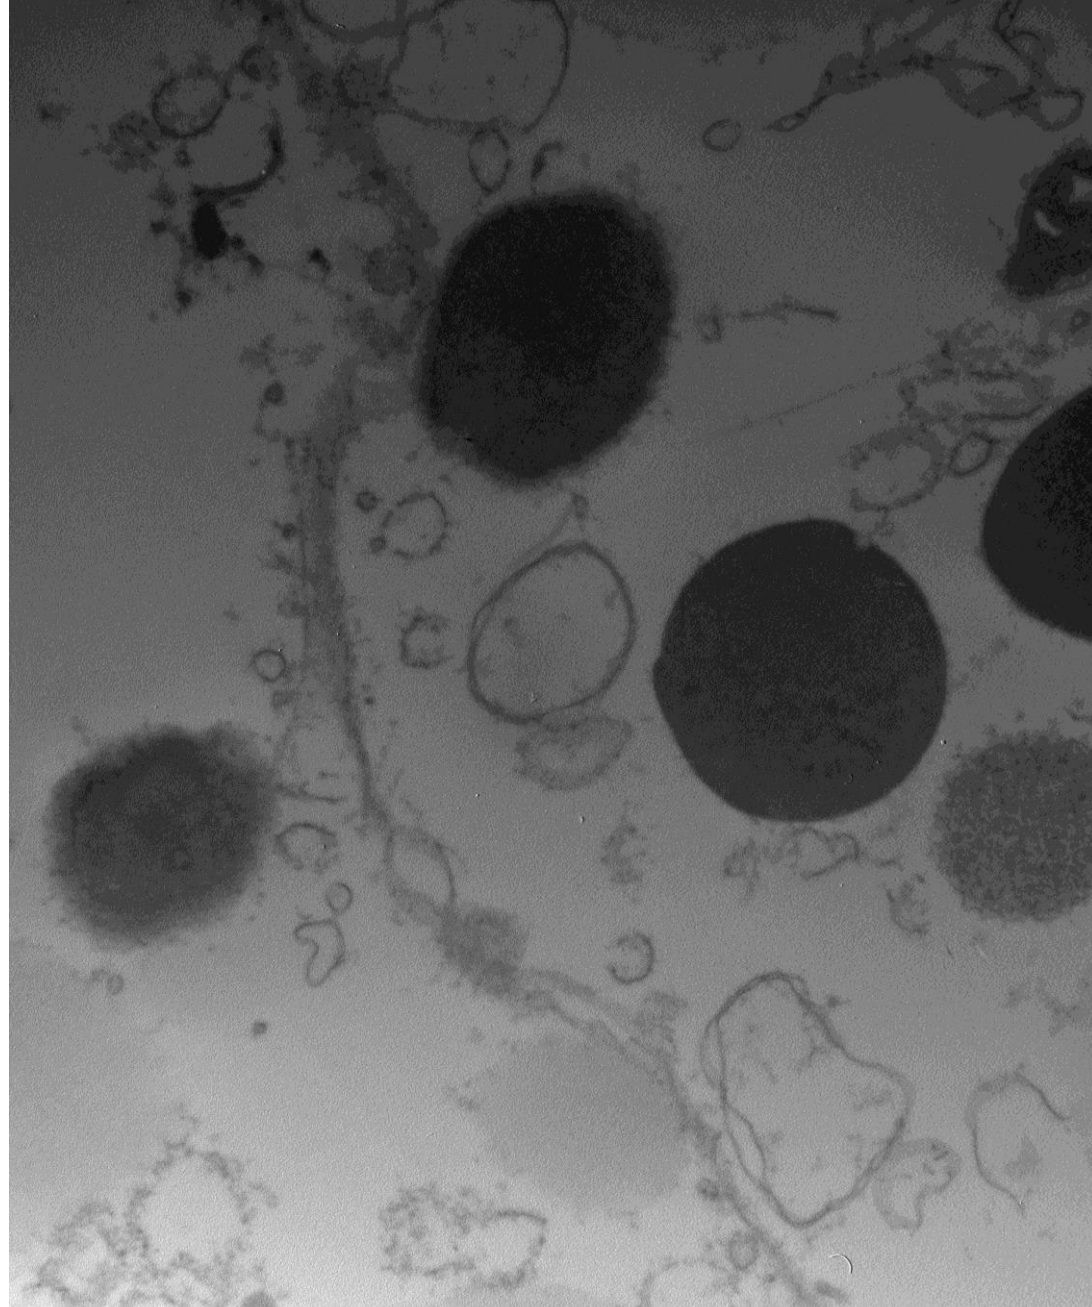

6FM4-grid3-c.tif  
Print Mag: 37x @ 7.0 in  
10:21 11/13/2018

10  $\mu$ m  
HV=80kV  
Direct Mag: 18 x

6 week 1 (transverse)

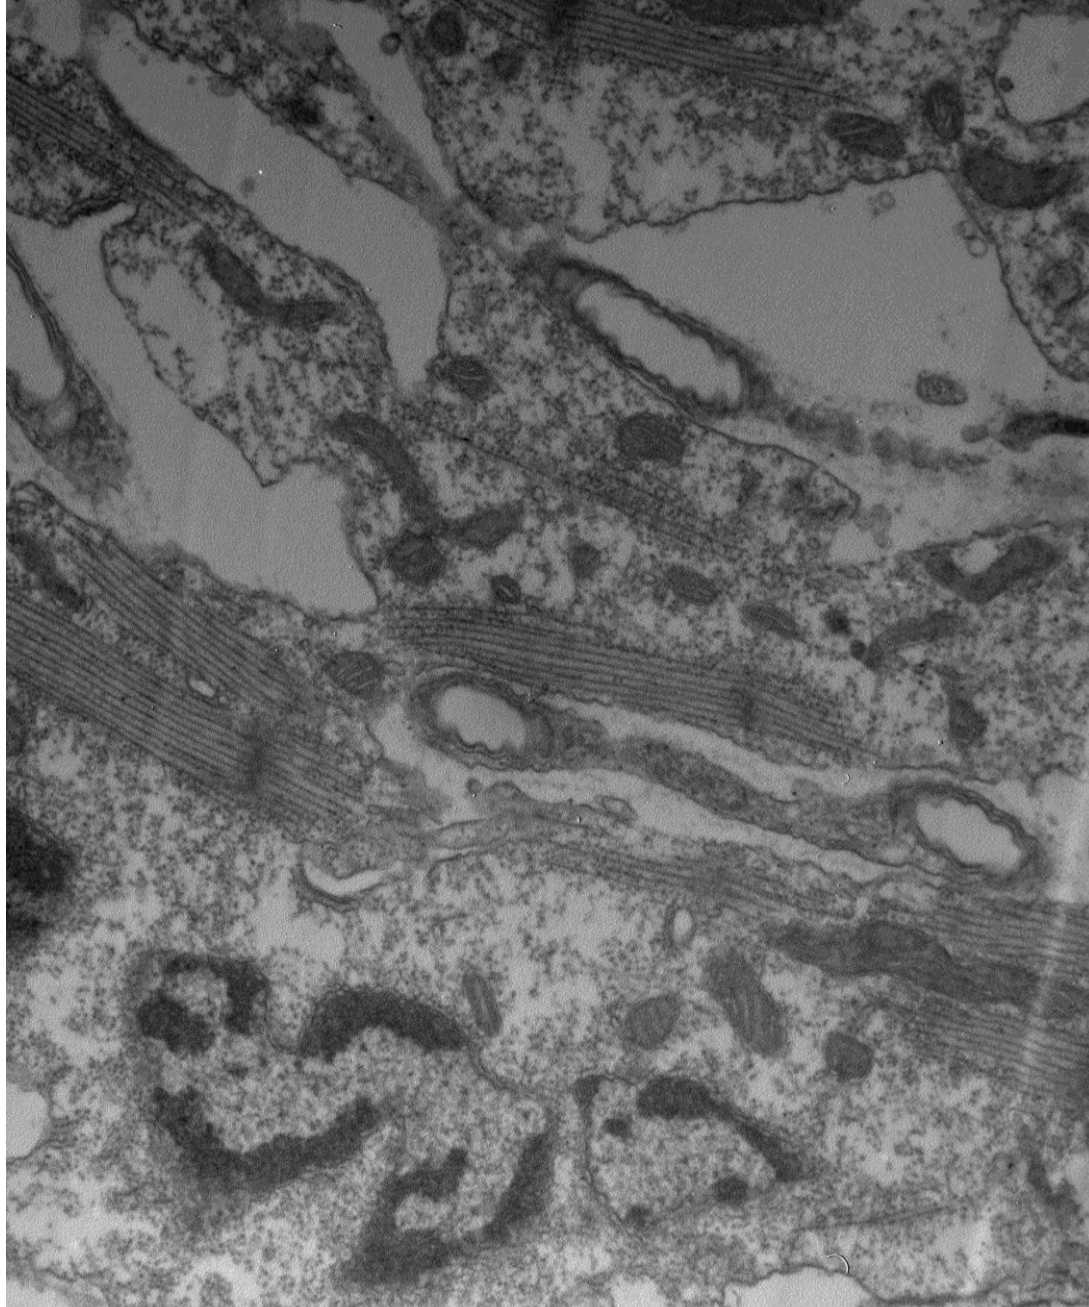

6FM1-grid5-b.tif  
Print Mag: 37x @ 7.0 in  
11:27 11/13/2018

10  $\mu$ m  
HV=80kV  
Direct Mag: 18 x

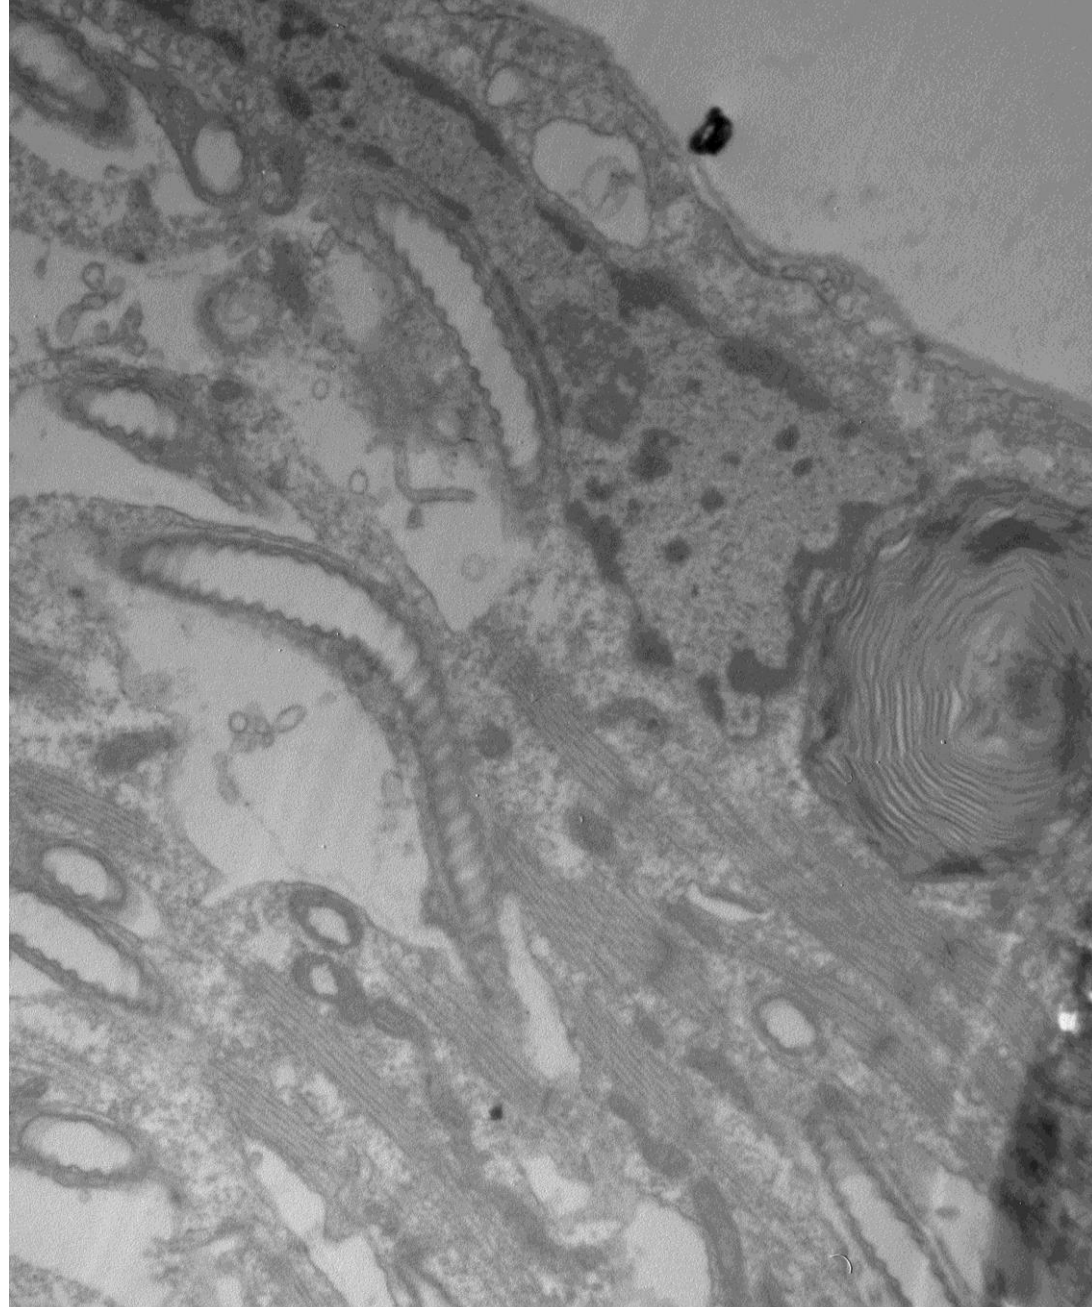

6FM1-grid3-c.tif  
Print Mag: 37x @ 7.0 in  
11:01 11/13/2018

10  $\mu$ m  
HV=80kV  
Direct Mag: 18 x



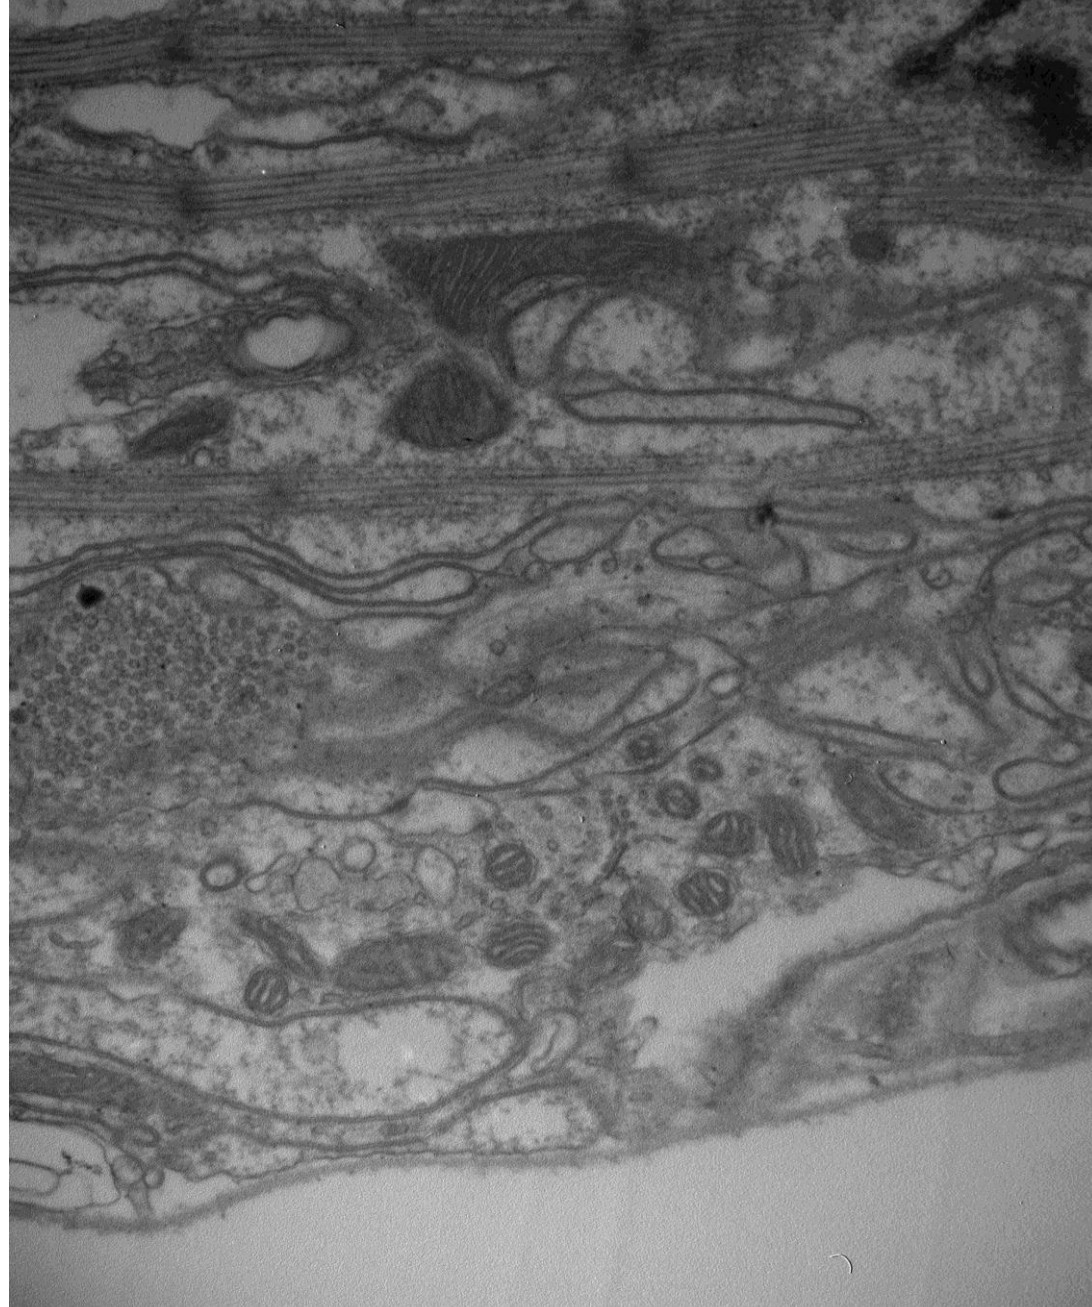

6FM1-grid3-b.tif  
Print Mag: 37x @ 7.0 in  
11:00 11/13/2018

10  $\mu$ m  
HV=80kV  
Direct Mag: 18 x

9 week 1

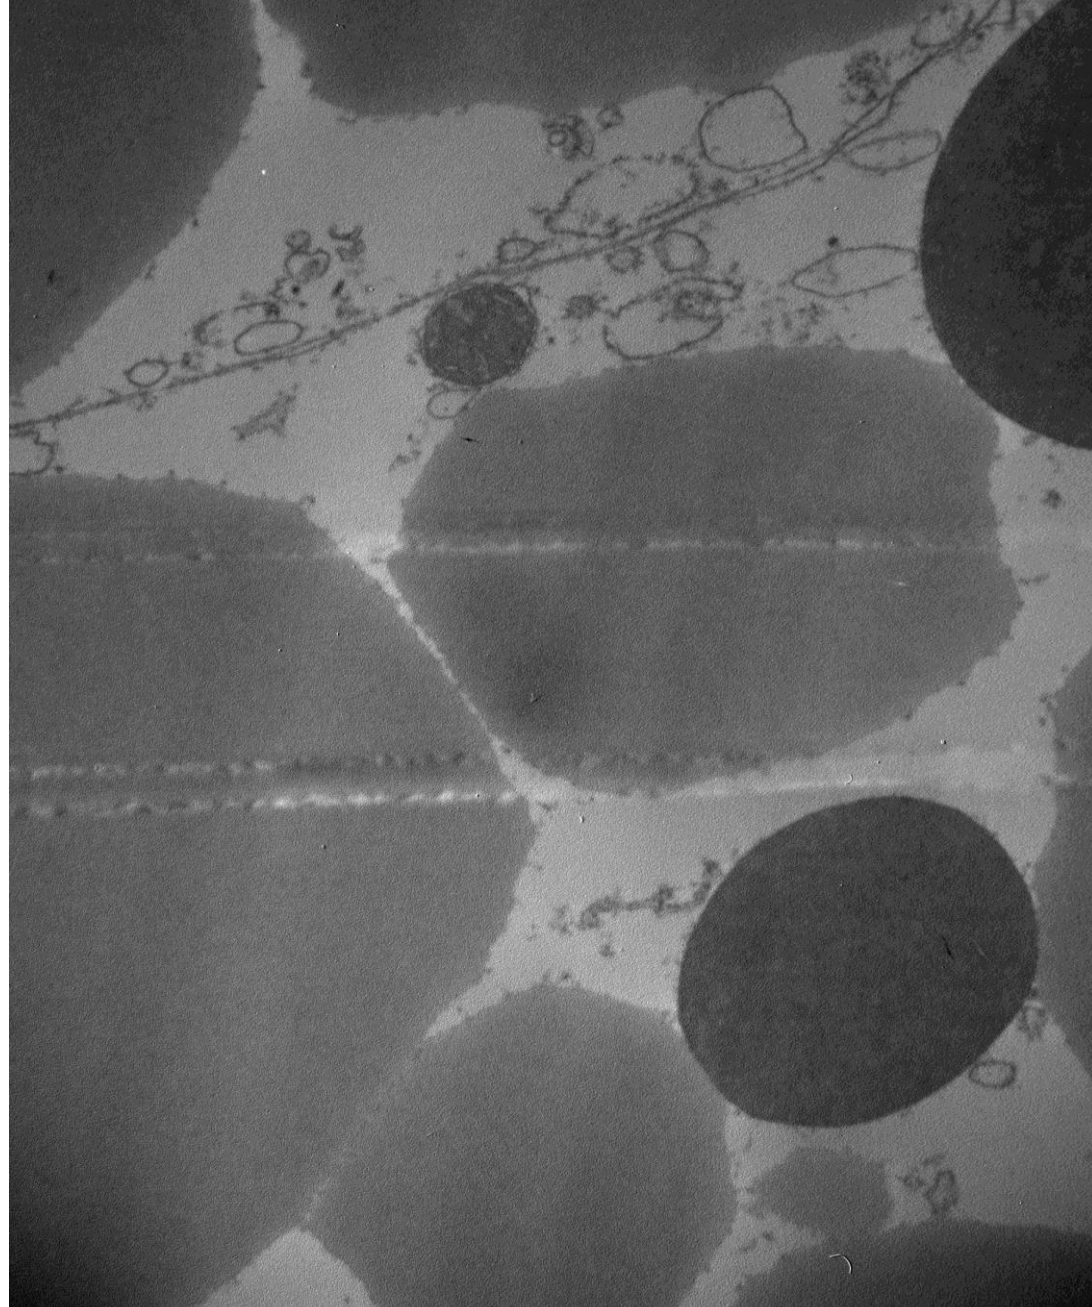

9FM1-grid4-c.tif  
Print Mag: 37x @ 7.0 in  
11:56 11/13/2018

10  $\mu$ m  
HV=80kV  
Direct Mag: 18 x

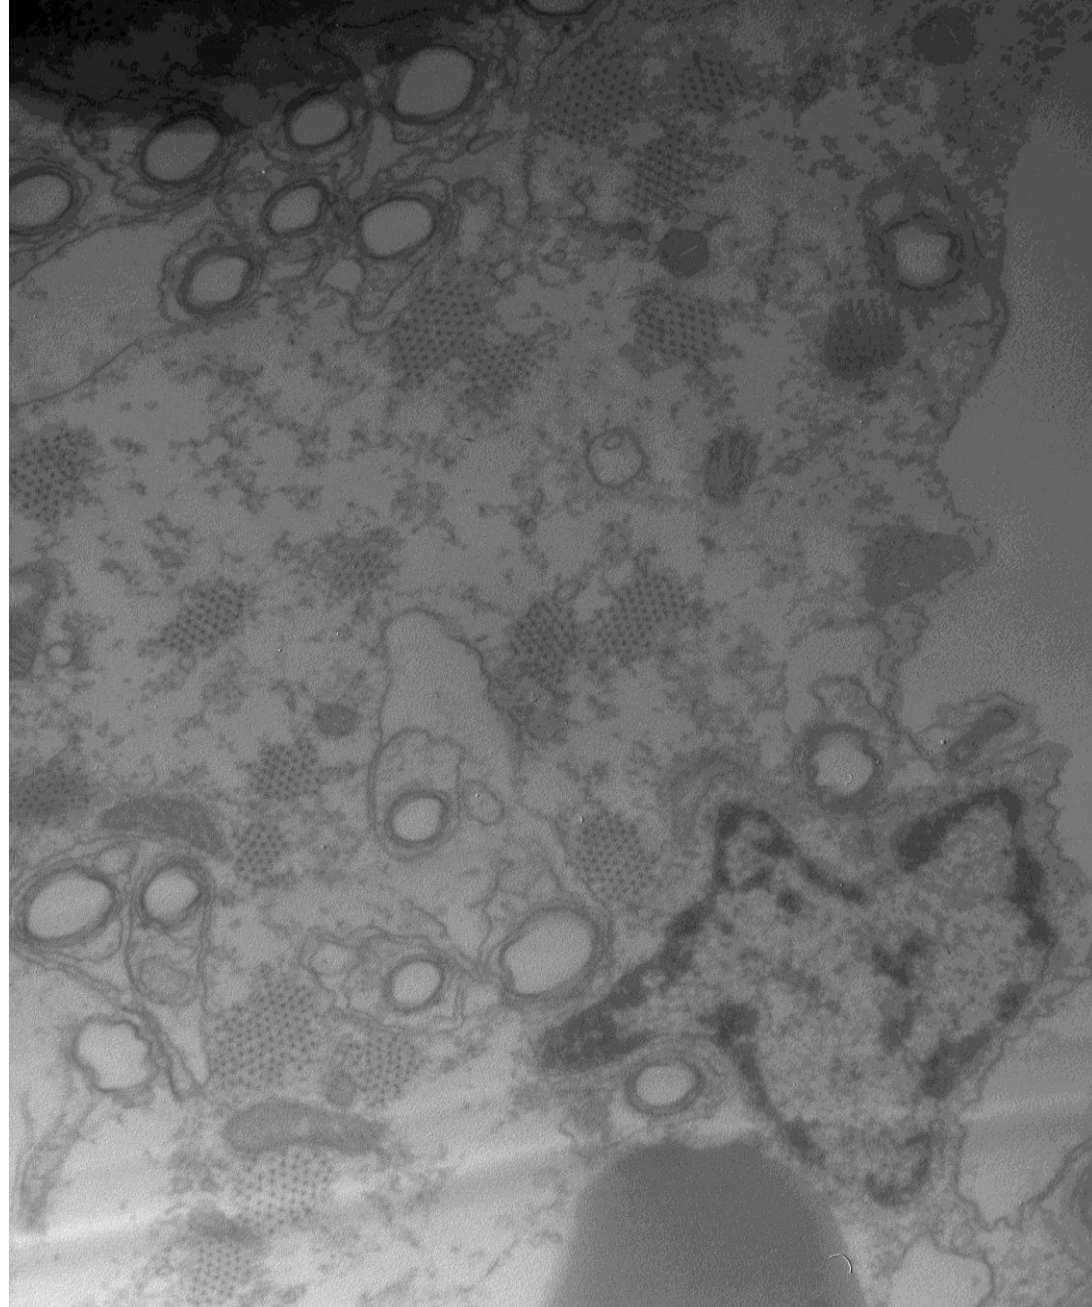

9FM1-grid4-b.tif  
Print Mag: 37x @ 7.0 in  
11:52 11/13/2018

10  $\mu$ m  
HV=80kV  
Direct Mag: 18 x

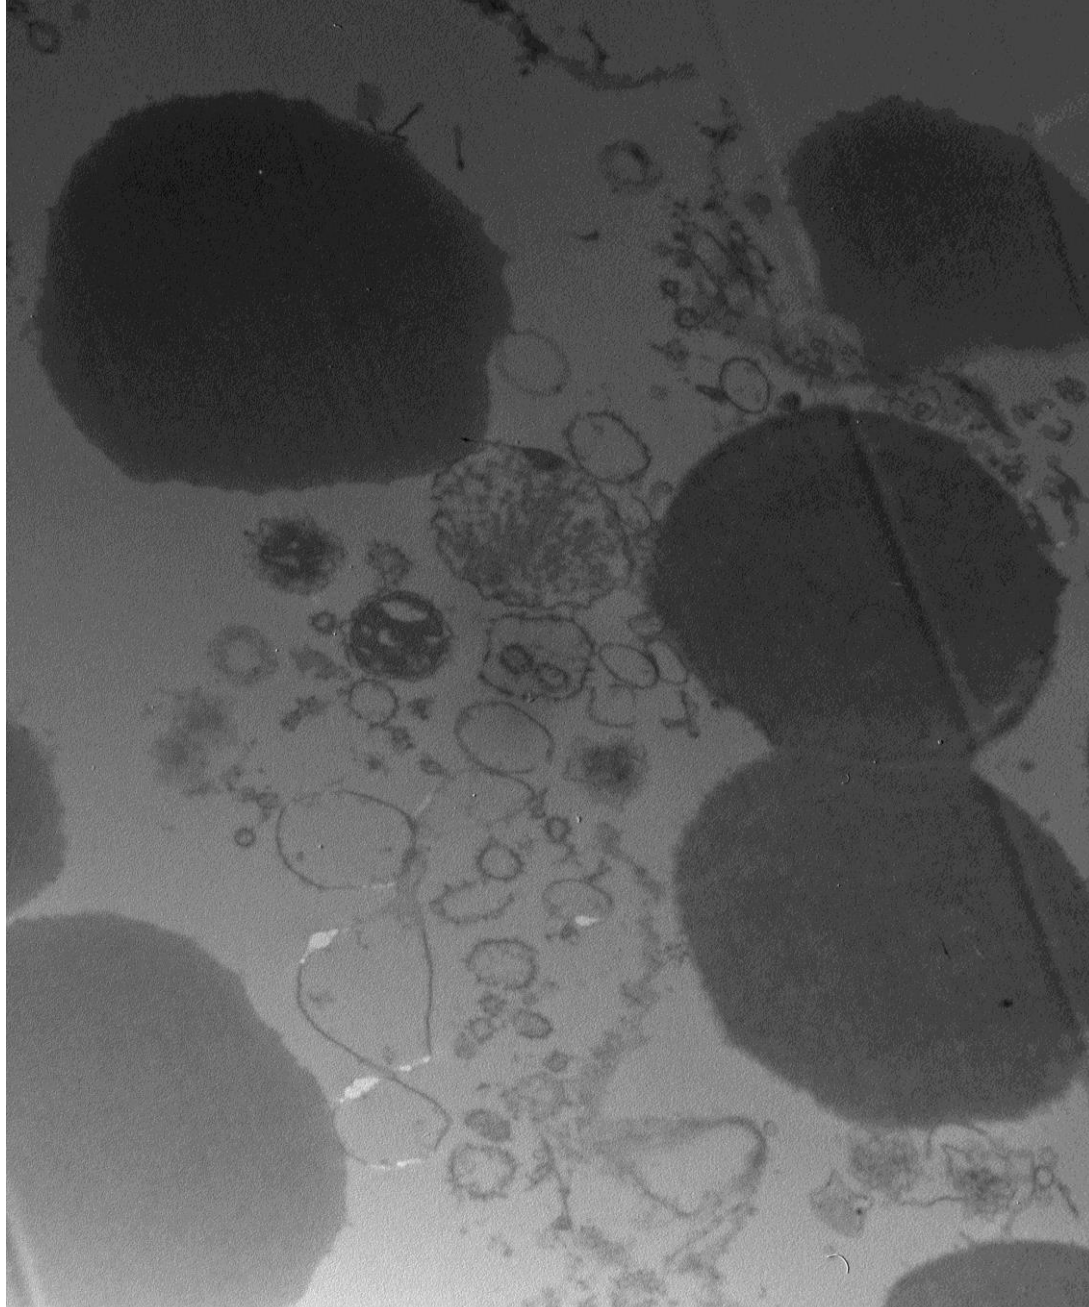

9FM1-grid3-d.tif  
Print Mag: 37x @ 7.0 in  
11:42 11/13/2018

10  $\mu$ m  
HV=80kV  
Direct Mag: 18 x

9 week 2

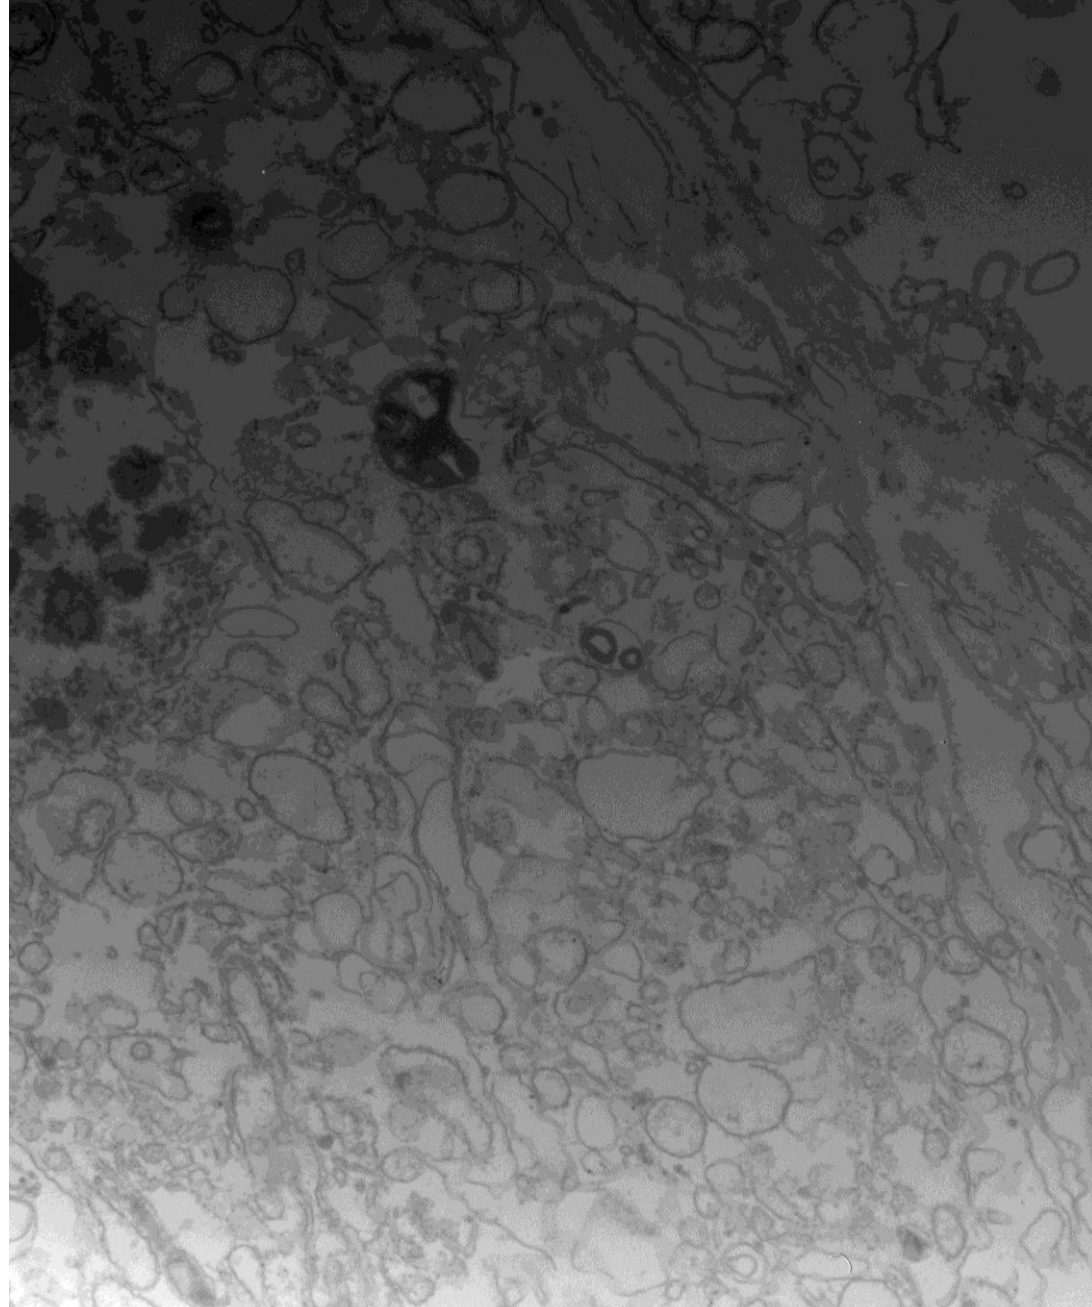

9FM2-grid2-g.tif  
Print Mag: 37x @ 7.0 in  
11:31 11/8/2018

10  $\mu$ m  
HV=80kV  
Direct Mag: 18 x

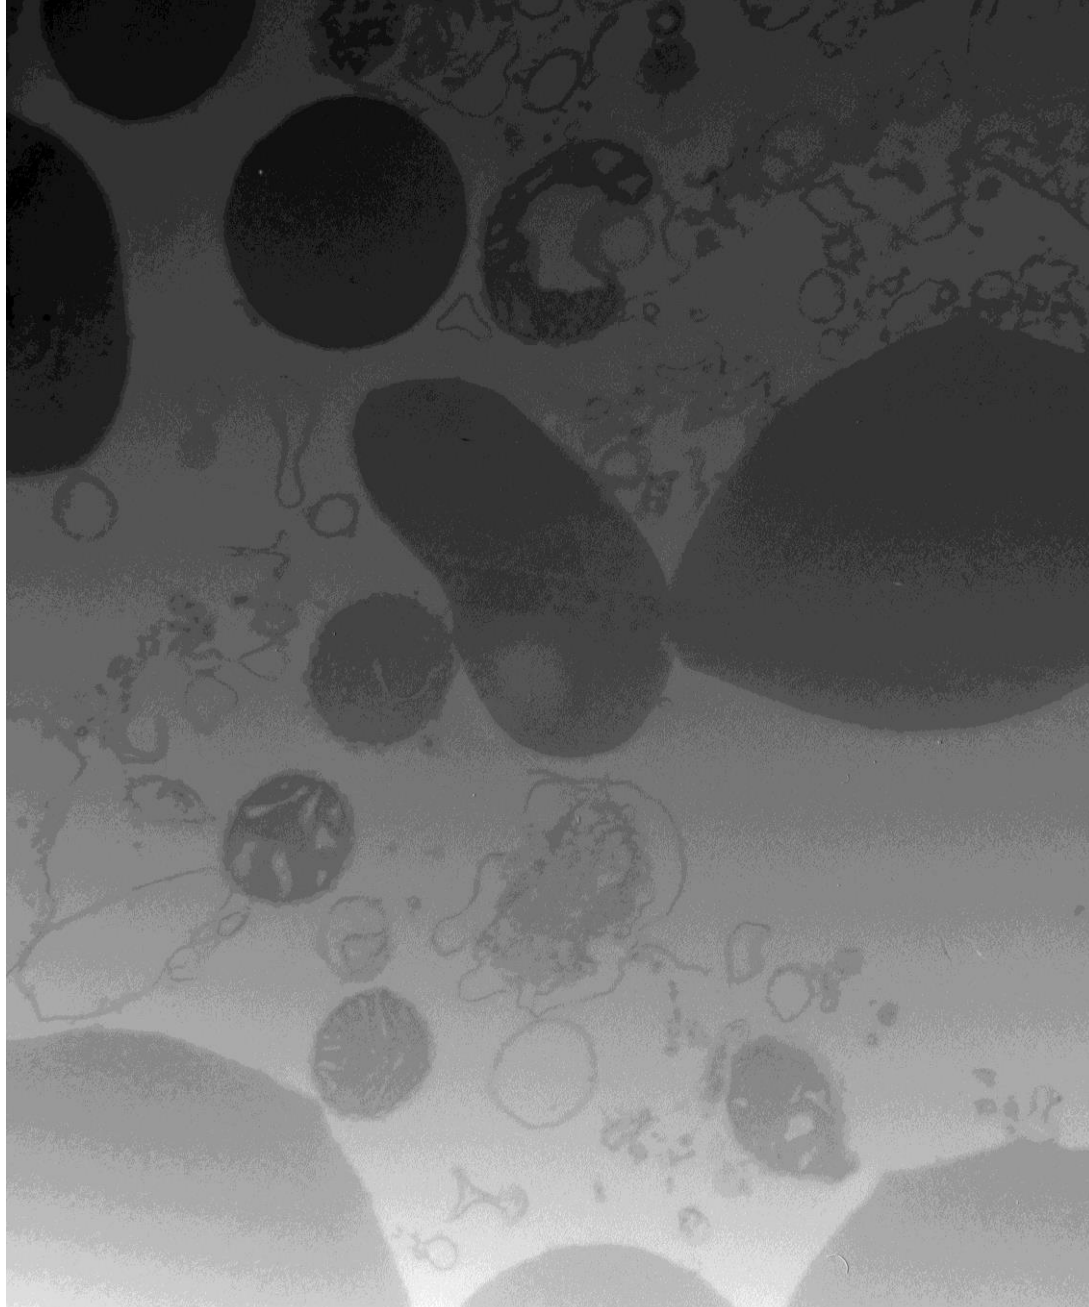

9FM2-grid2-c.tif  
Print Mag: 37x @ 7.0 in  
11:24 11/8/2018

10  $\mu$ m  
HV=80kV  
Direct Mag: 18 x



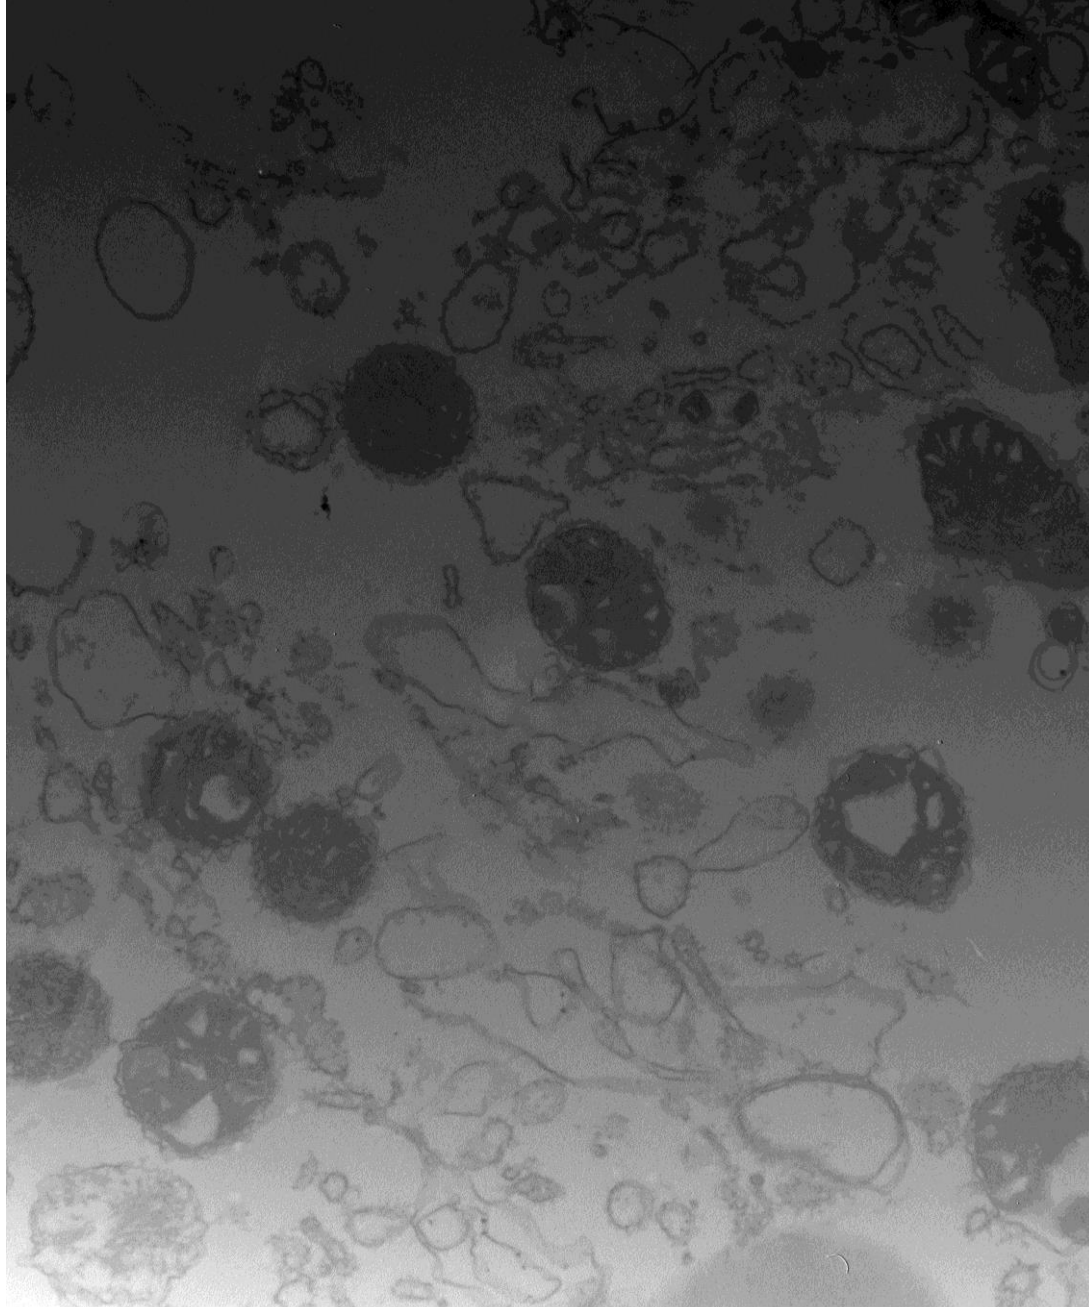

9FM2-grid1-c.tif  
Print Mag: 37x @ 7.0 in  
11:11 11/8/2018

10  $\mu$ m  
HV=80kV  
Direct Mag: 18 x

15 week 1

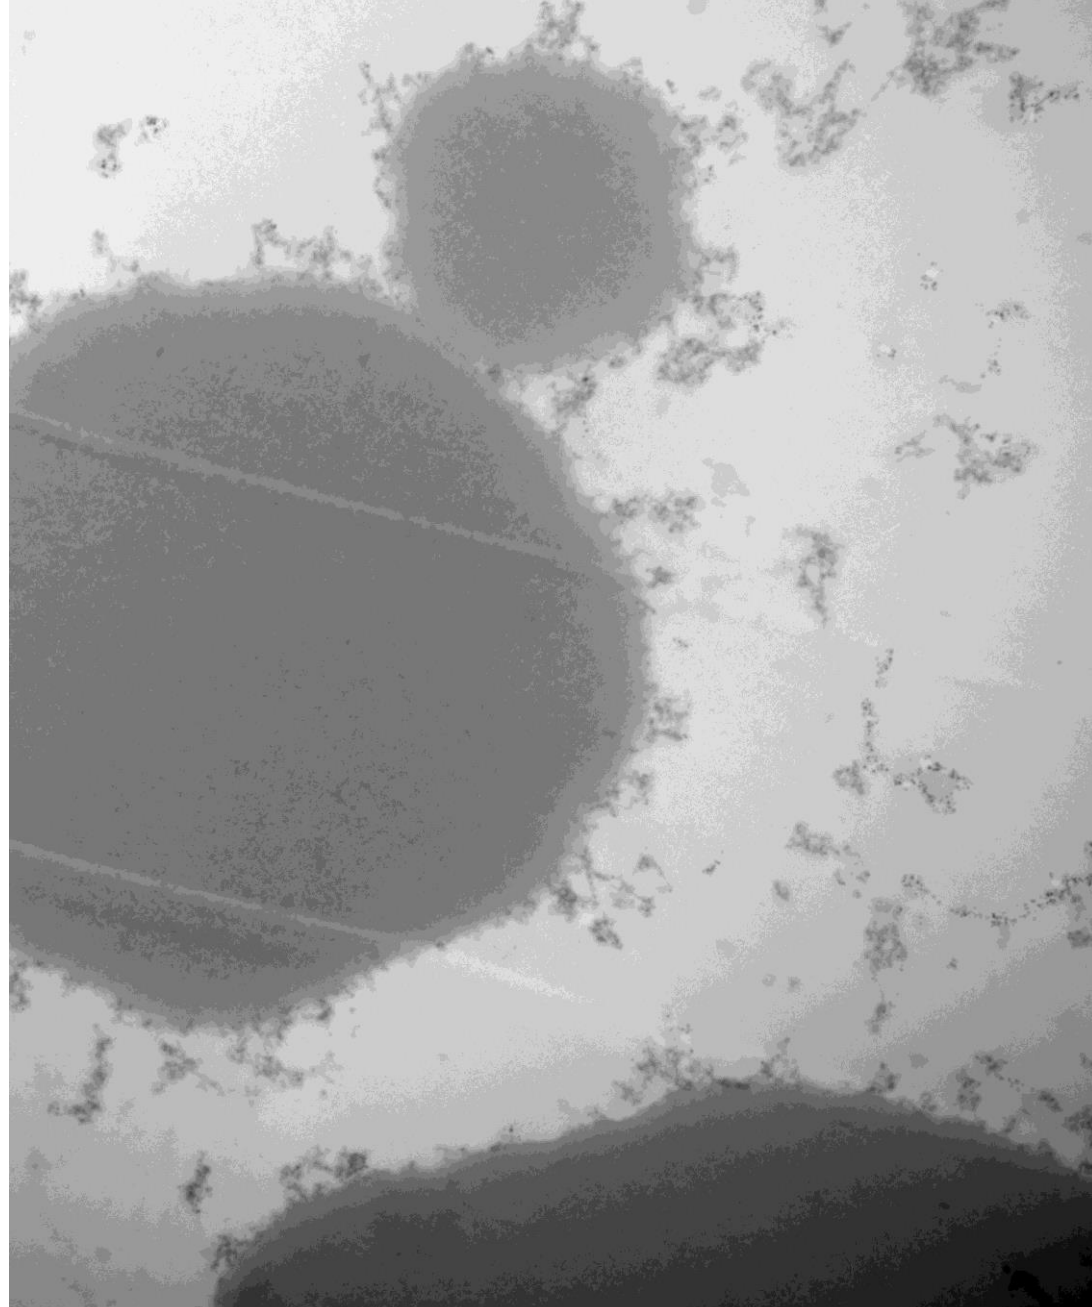

15FM1-grid5.tif  
Print Mag: 37x @ 7.0 in  
14:50 12/3/2018

10  $\mu$ m  
HV=60kV  
Direct Mag: 18 x

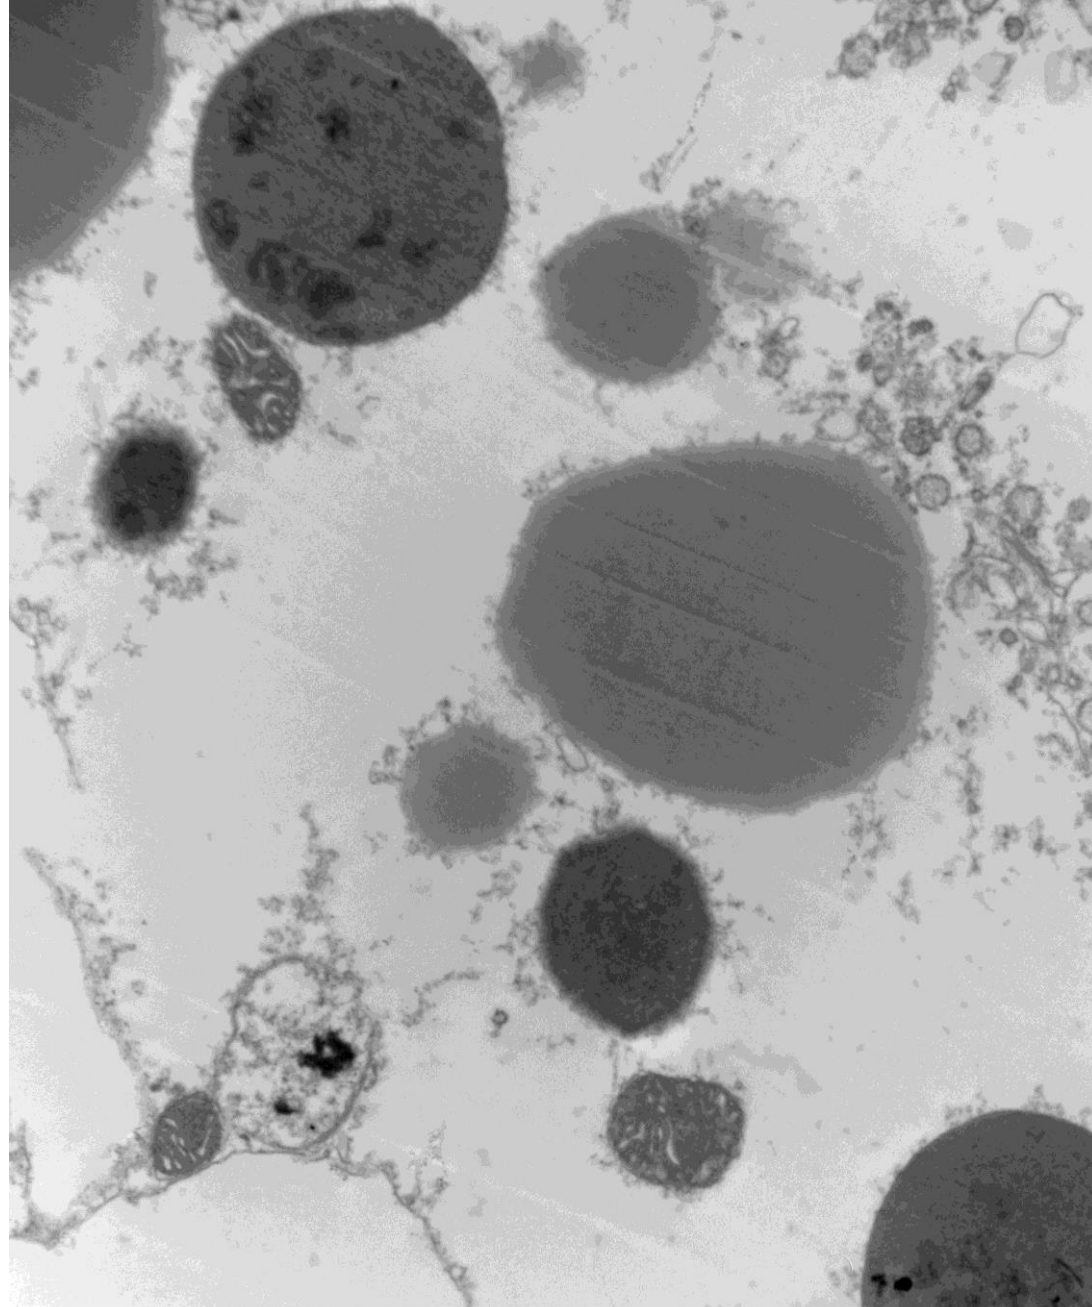

15FM1-grid5-d-10500x.tif  
Print Mag: 37x @ 7.0 in  
14:48 12/3/2018

|  
10  $\mu$ m  
HV=60kV  
Direct Mag: 18 x

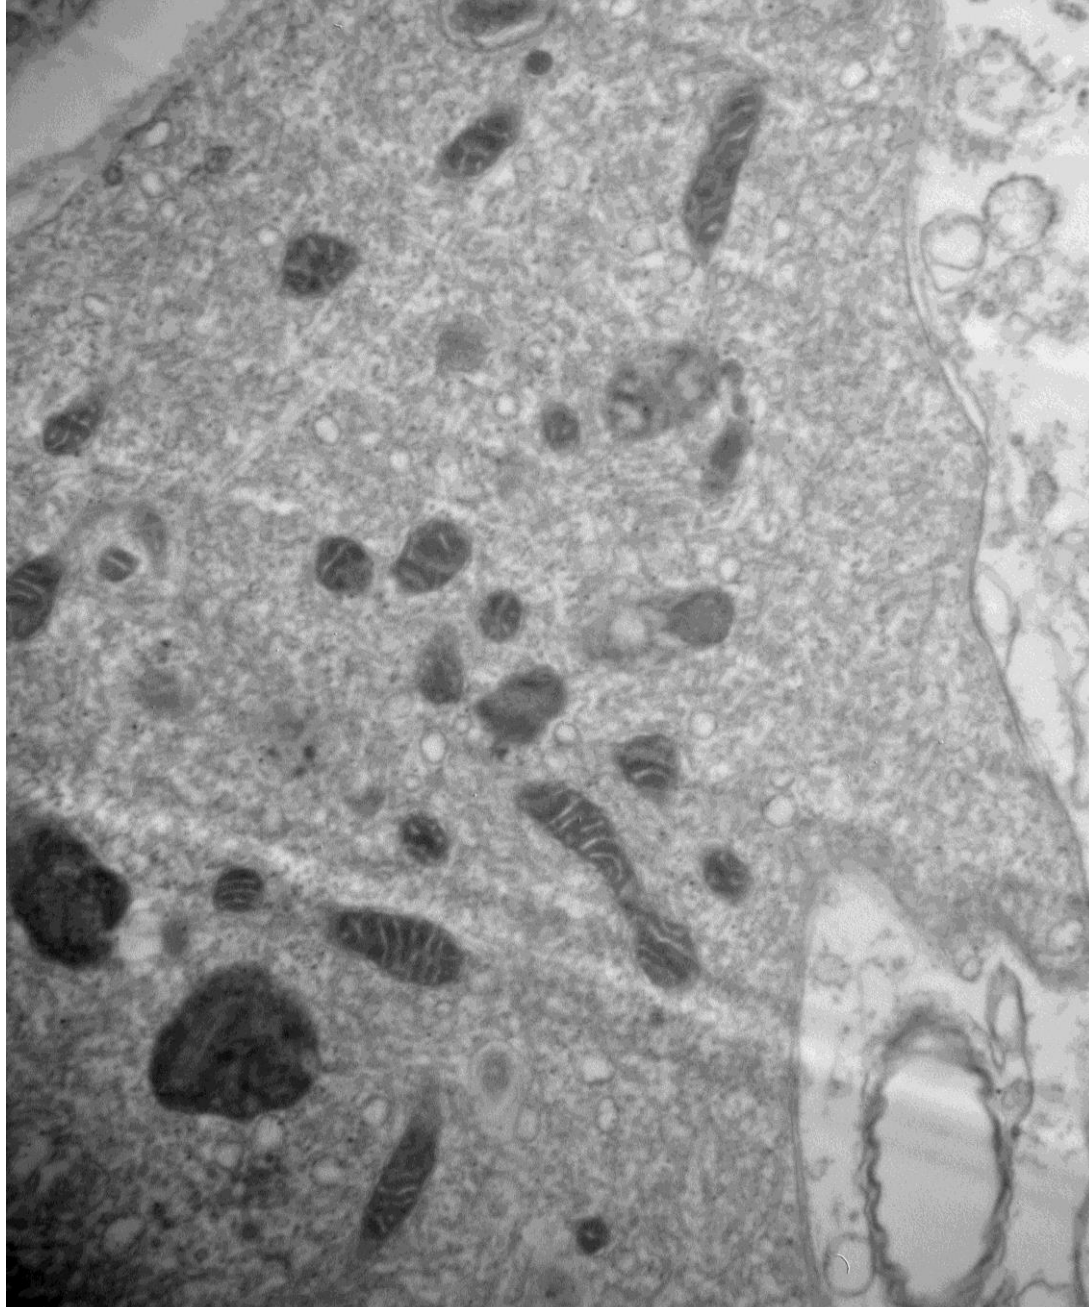

15FM1-grid3-g.tif  
Print Mag: 37x @ 7.0 in  
14:38 12/3/2018

10  $\mu$ m  
HV=60kV  
Direct Mag: 18 x

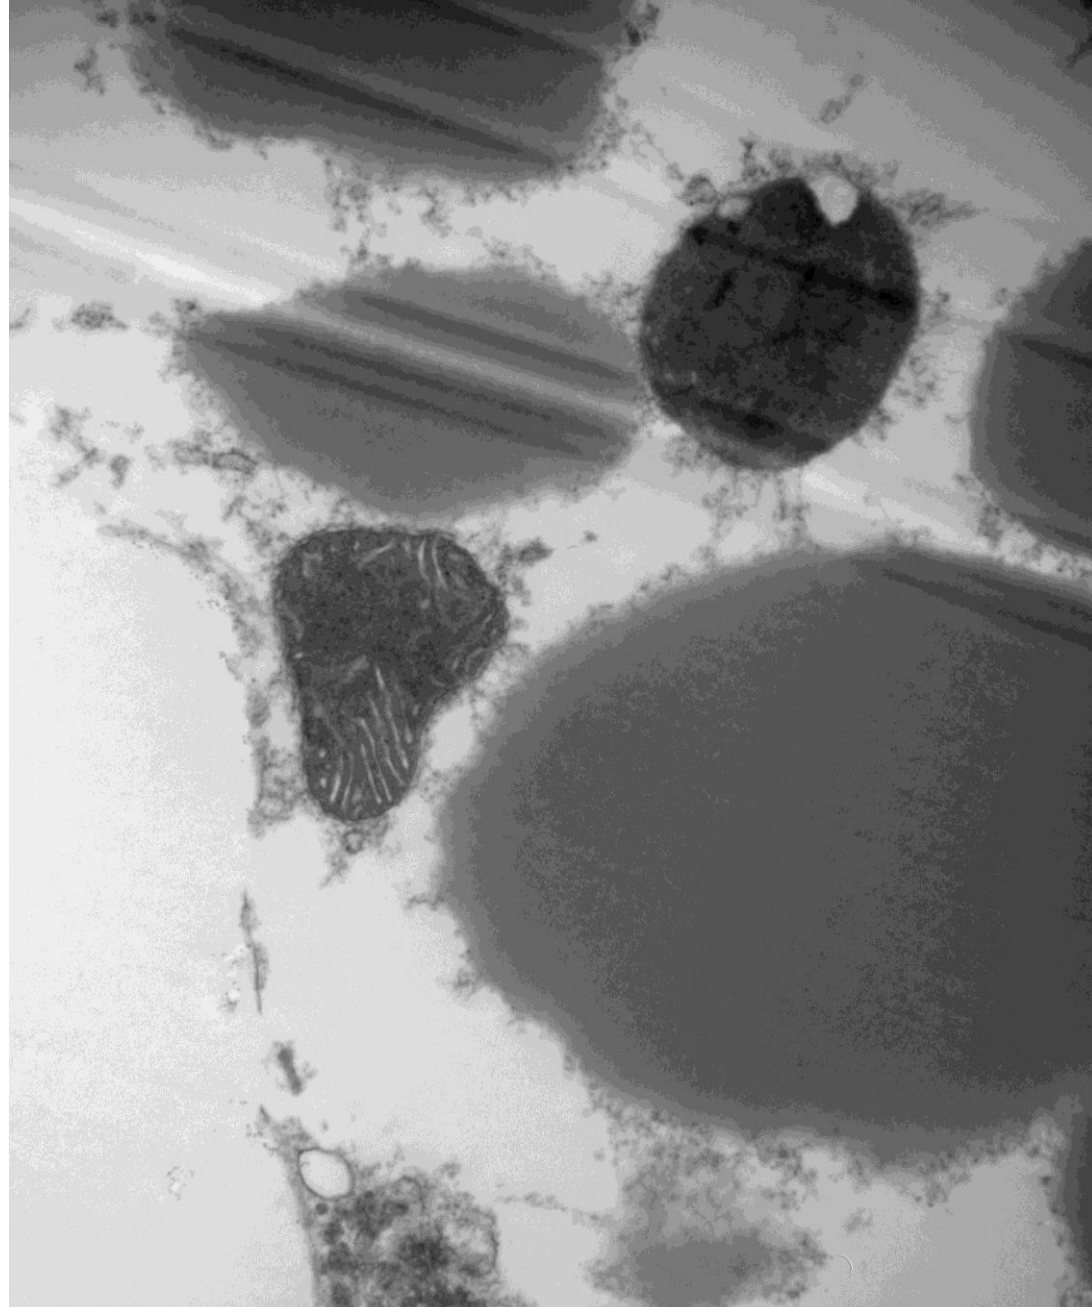

15FM1-grid3-c.tif  
Print Mag: 37x @ 7.0 in  
14:33 12/3/2018

10  $\mu$ m  
HV=60kV  
Direct Mag: 18 x

15 week 2

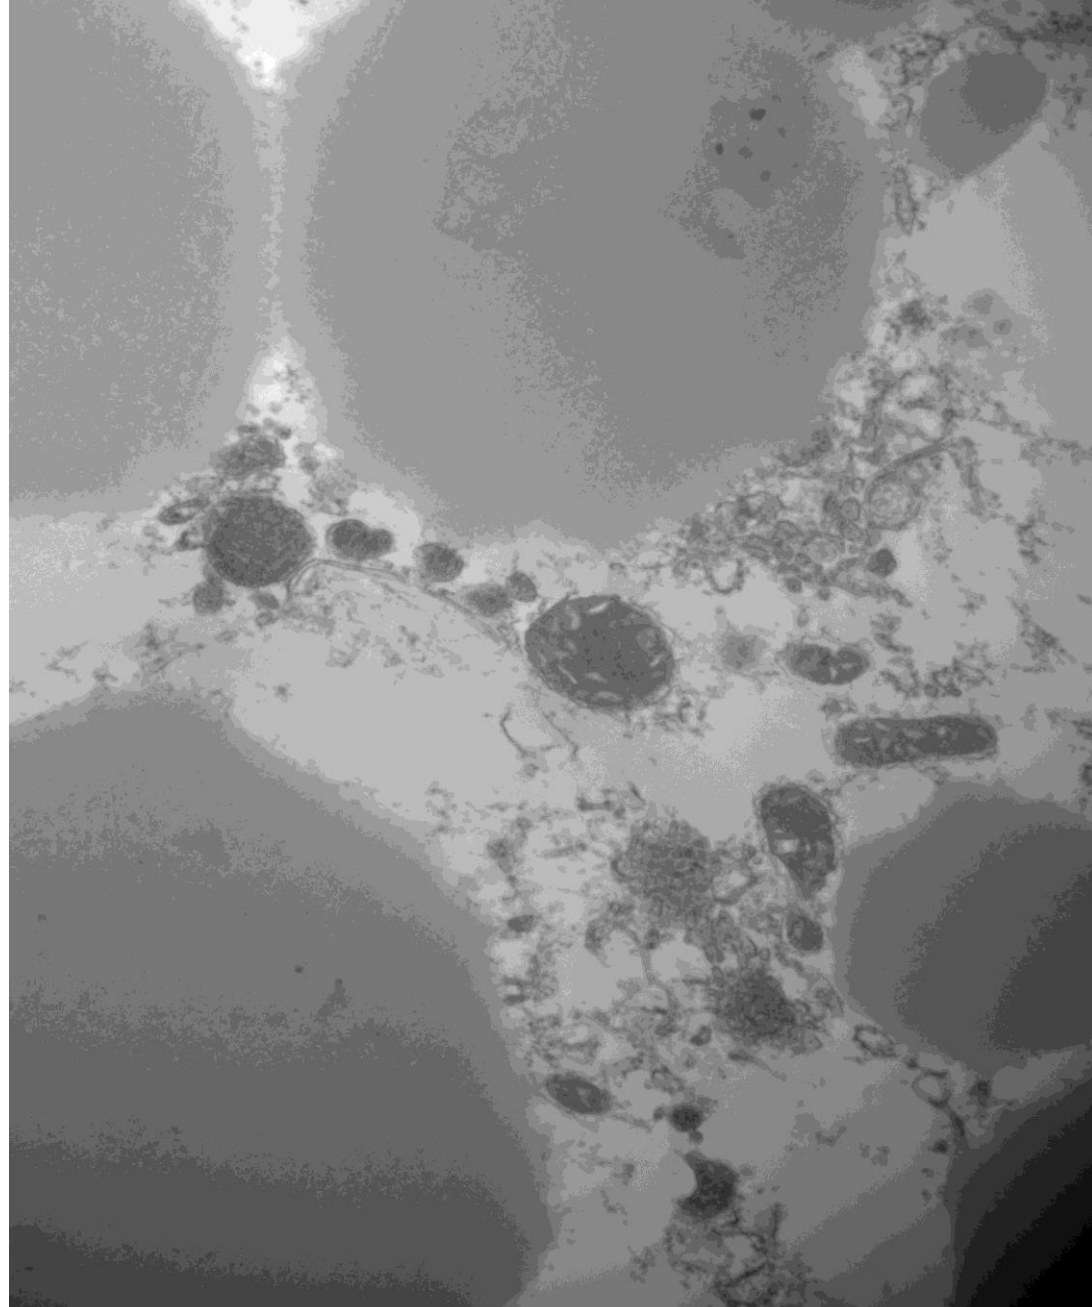

15FM2-grid5-b.tif  
Print Mag: 37x @ 7.0 in  
15:39 12/3/2018

|  
10  $\mu$ m  
HV=60kV  
Direct Mag: 18 x



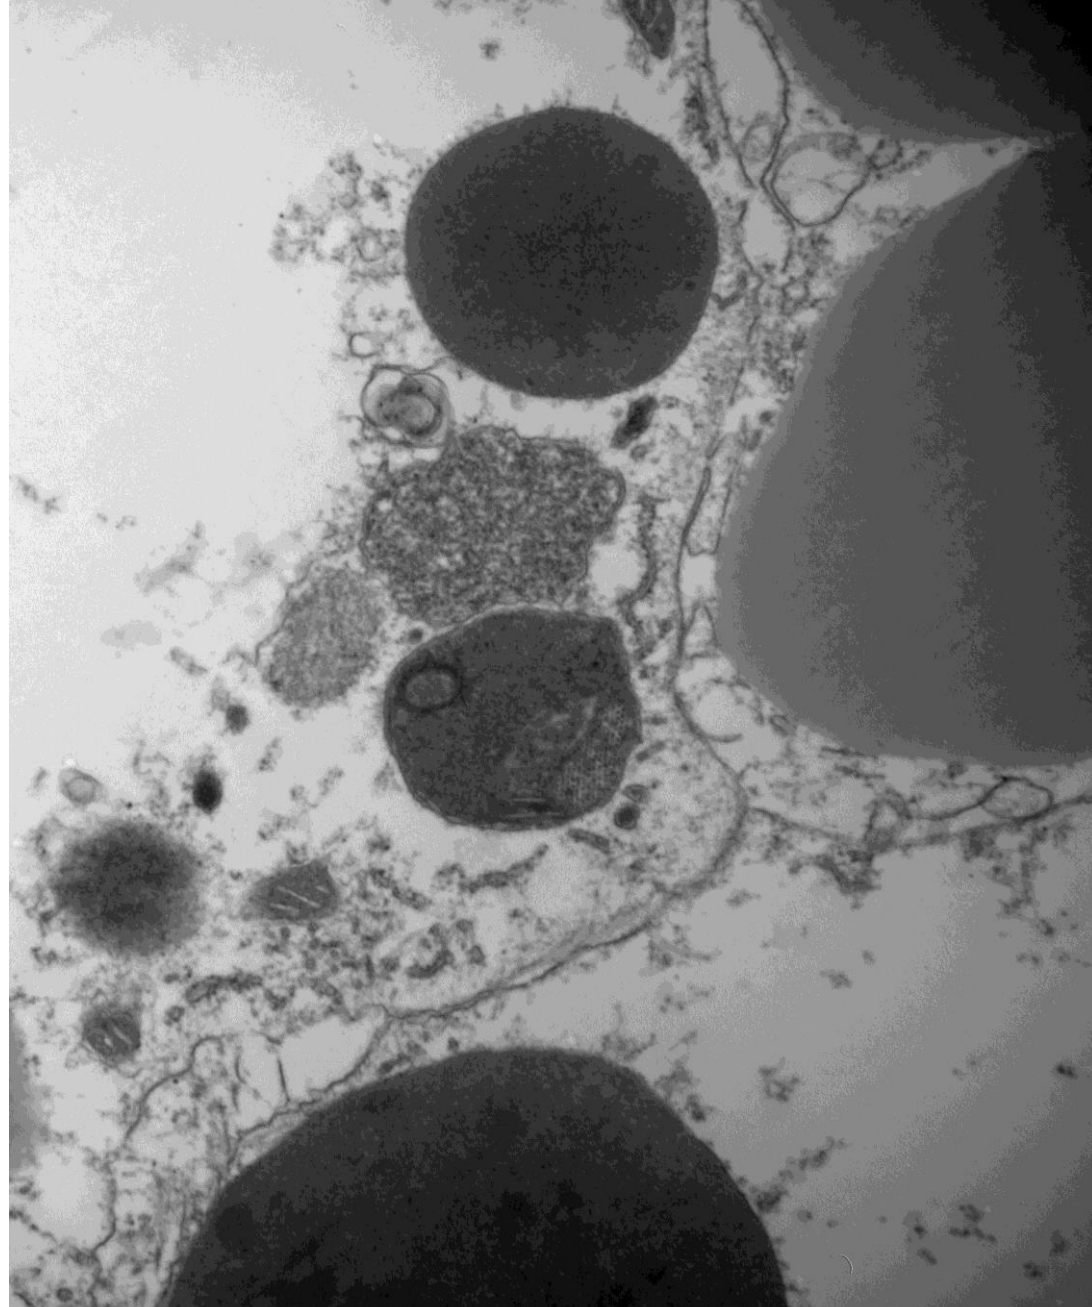

15FM2-grid1-e.tif  
Print Mag: 37x @ 7.0 in  
15:03 12/3/2018

|  
10  $\mu$ m  
HV=60kV  
Direct Mag: 18 x

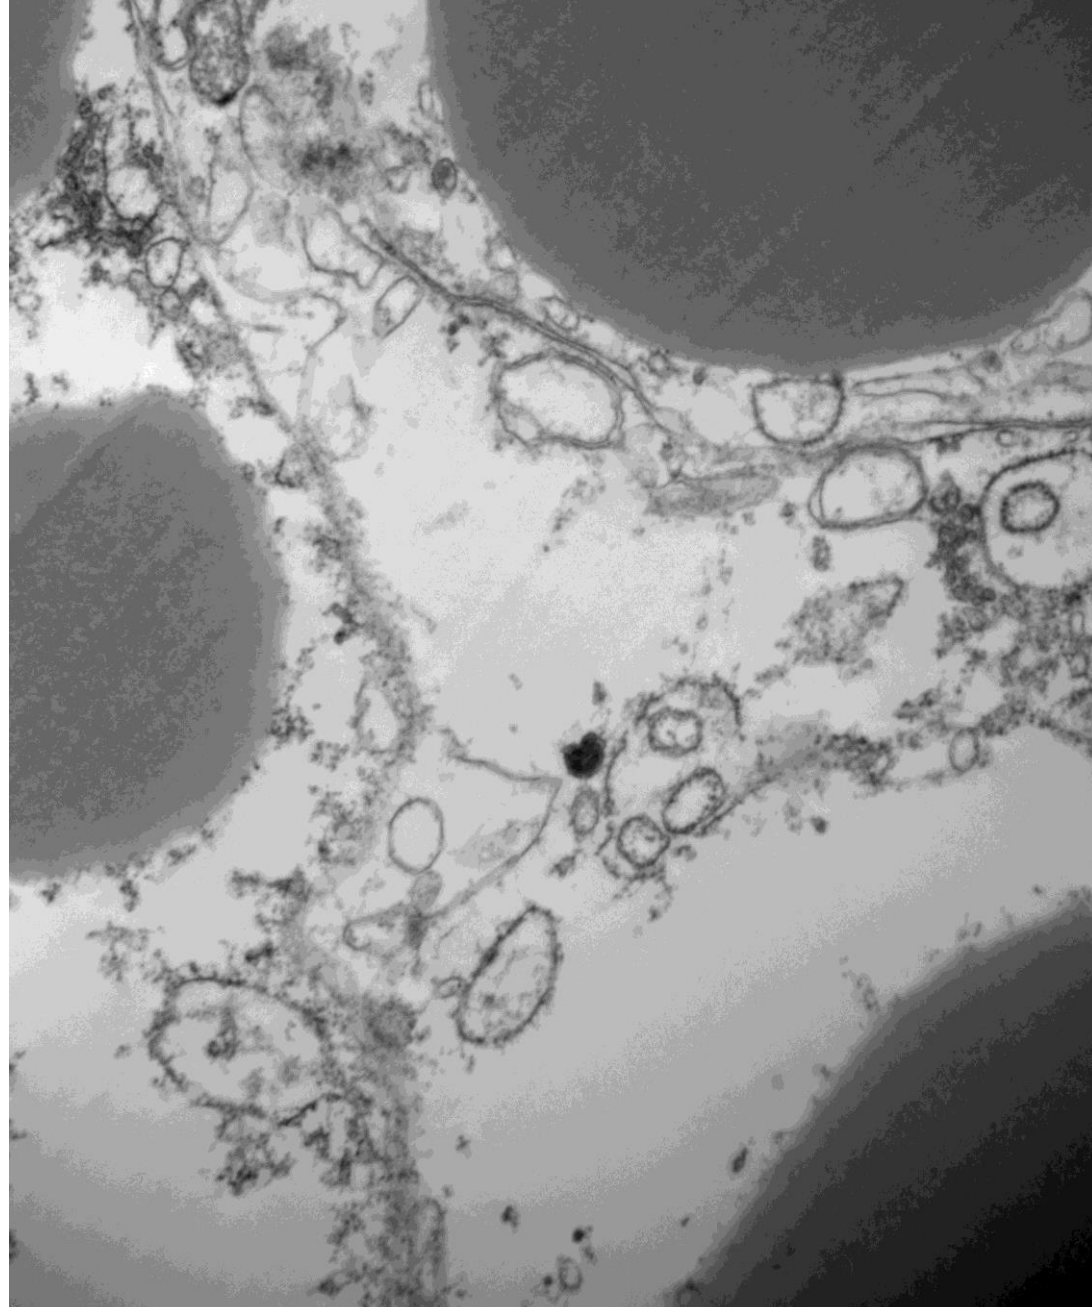

15FM2-grid1-c.tif  
Print Mag: 37x @ 7.0 in  
15:00 12/3/2018

10  $\mu$ m  
HV=60kV  
Direct Mag: 18 x

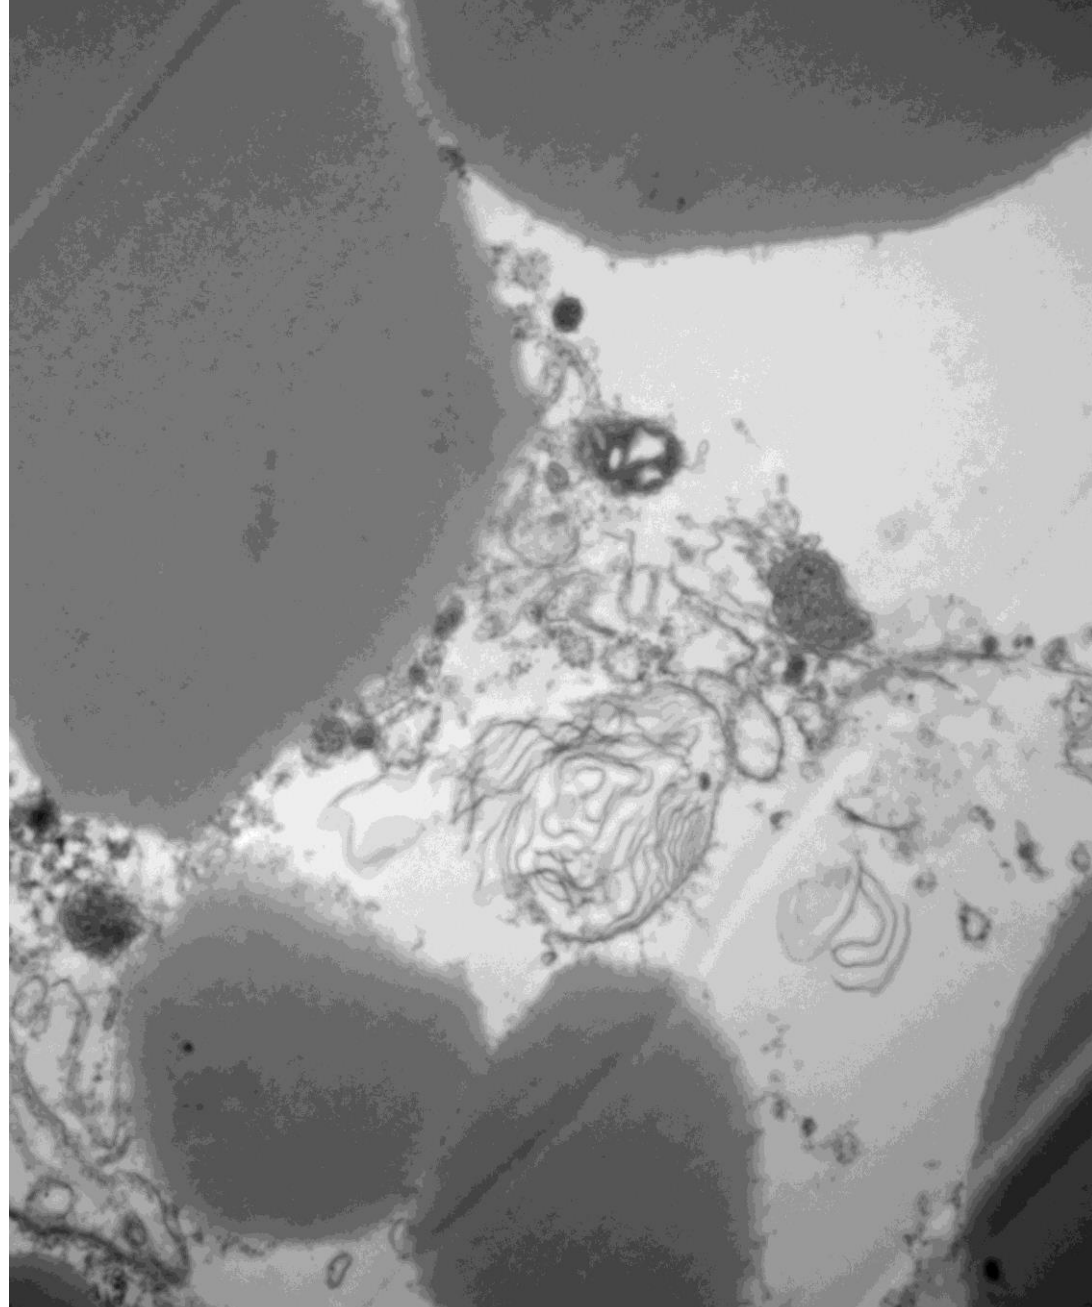

15FM2-grid1-a.tif  
Print Mag: 37x @ 7.0 in  
14:58 12/3/2018

10  $\mu$ m  
HV=60kV  
Direct Mag: 18 x

17 week 1 (emerged)

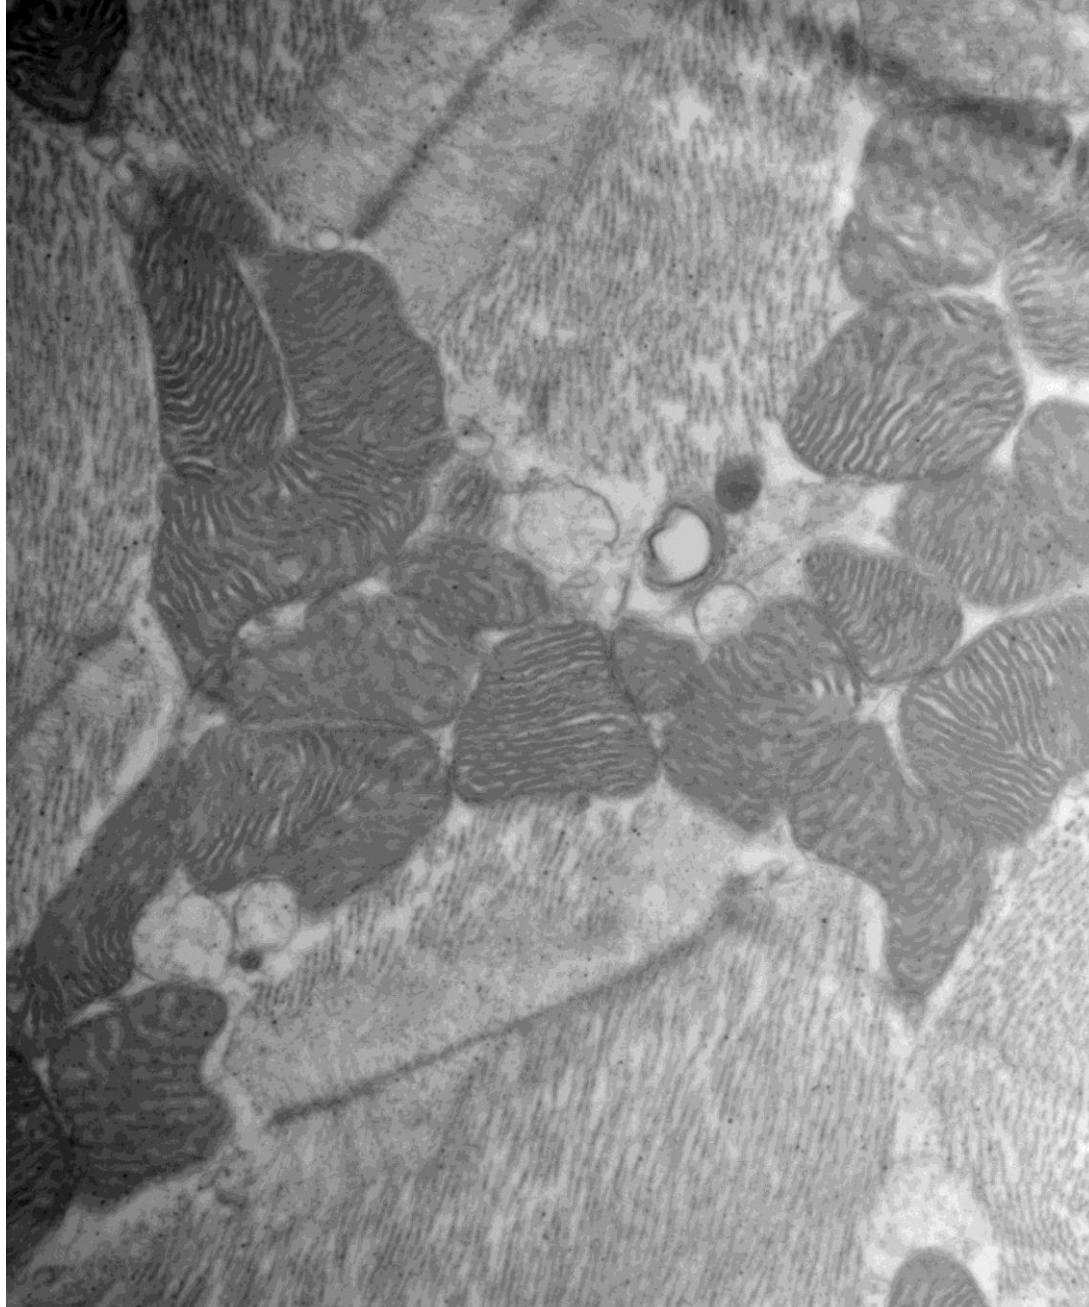

EFM1-grid3-j.tif  
Print Mag: 37x @ 7.0 in  
15:06 12/7/2018

10  $\mu$ m  
HV=60kV  
Direct Mag: 18 x

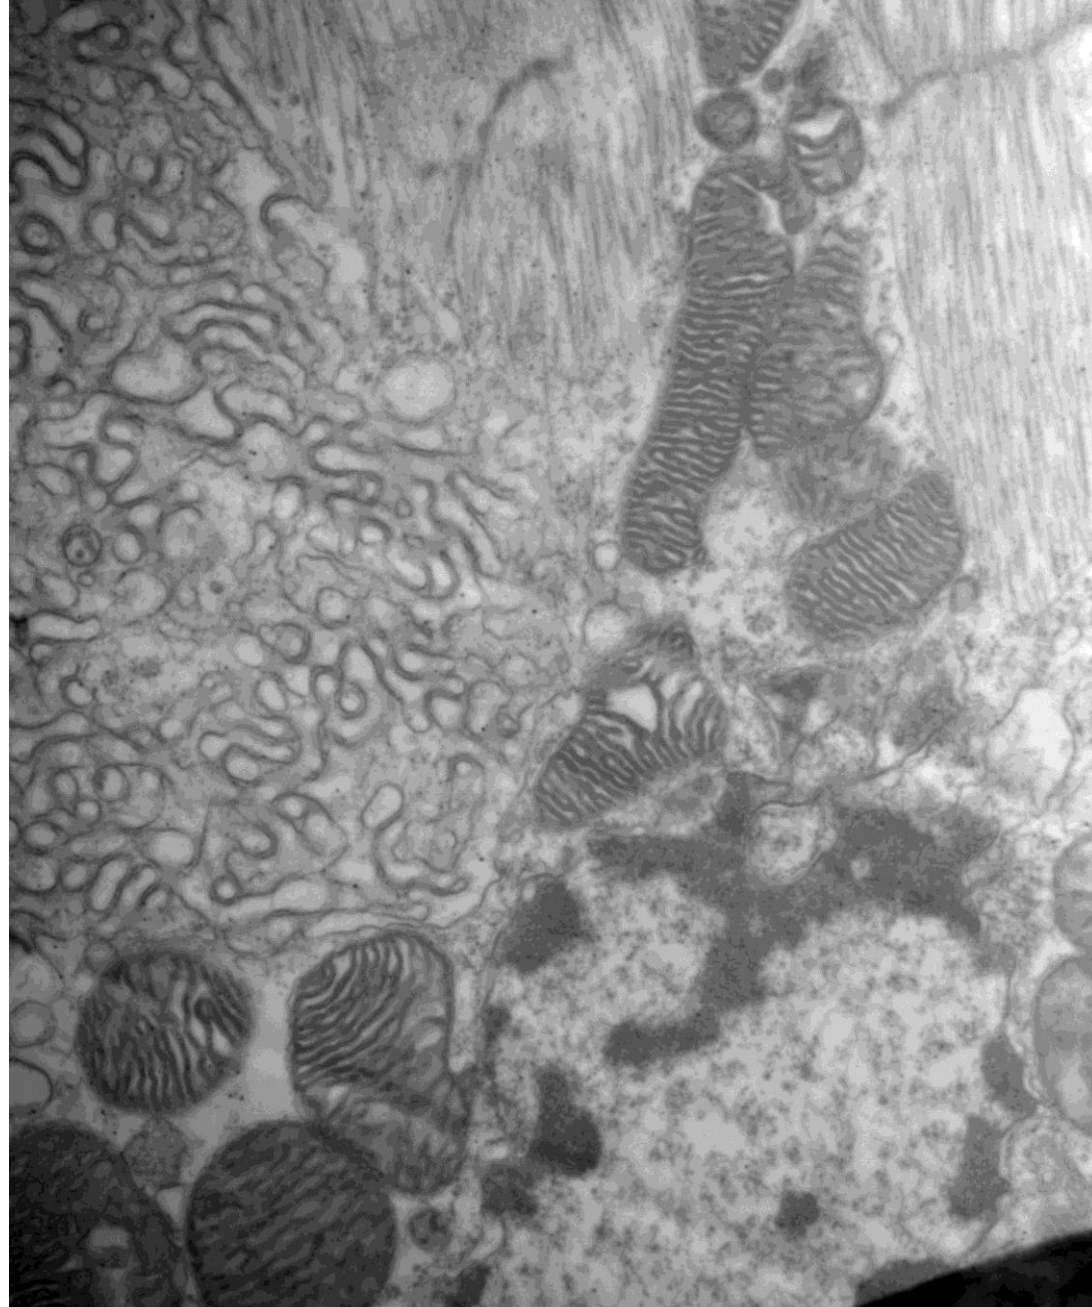

EFM1-grid3-f.tif  
Print Mag: 37x @ 7.0 in  
15:01 12/7/2018

|  
10  $\mu$ m  
HV=60kV  
Direct Mag: 18 x

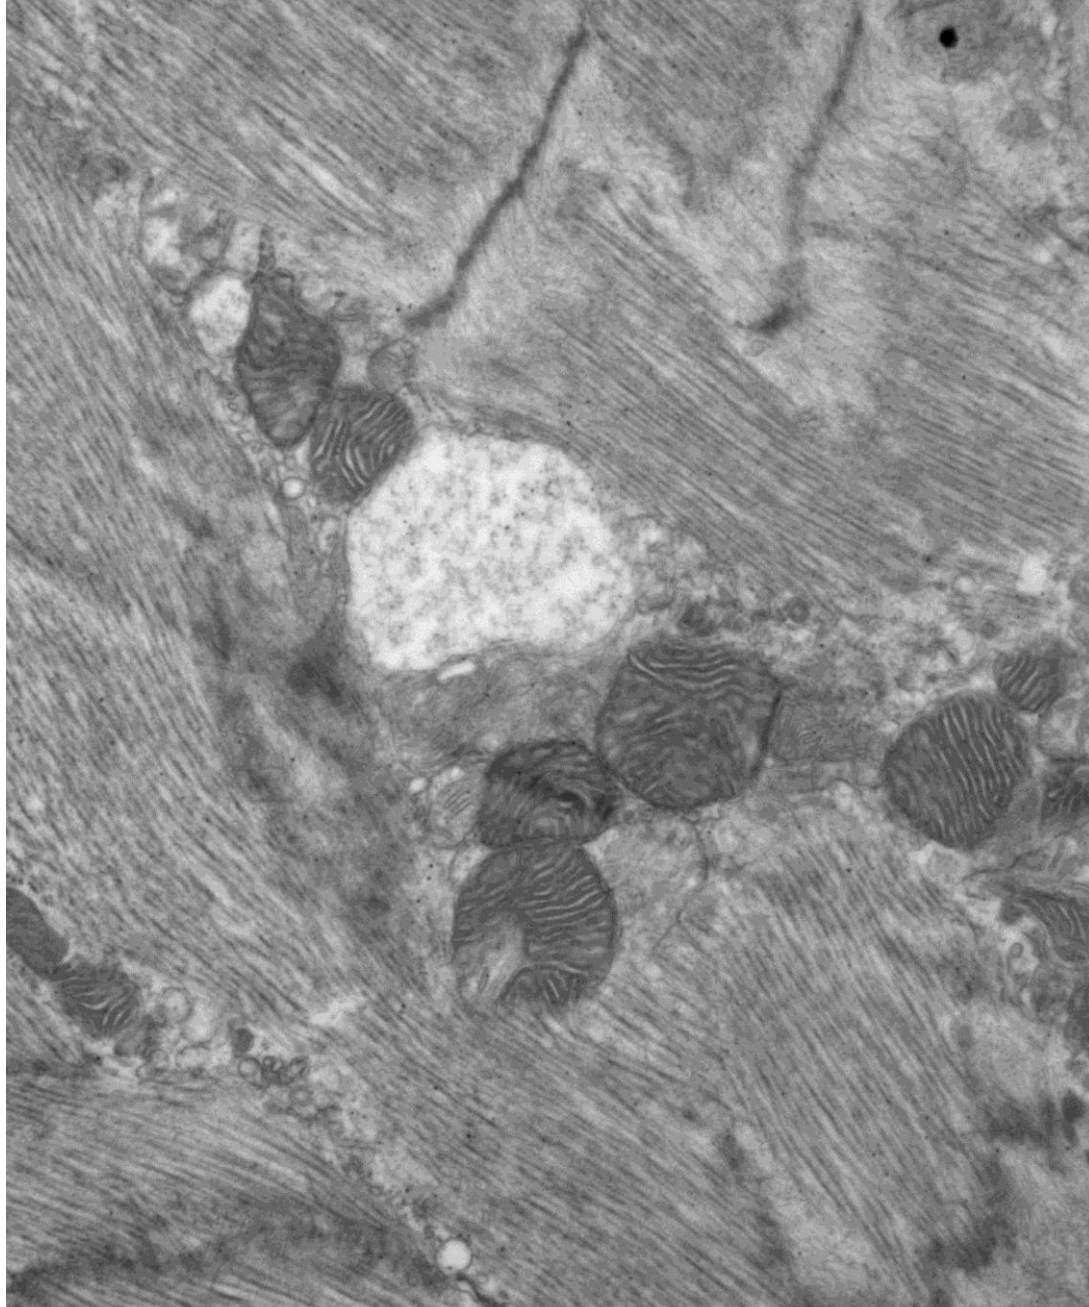

EFM1-grid3-d.tif  
Print Mag: 37x @ 7.0 in  
14:57 12/7/2018

|  
10  $\mu$ m  
HV=60kV  
Direct Mag: 18 x

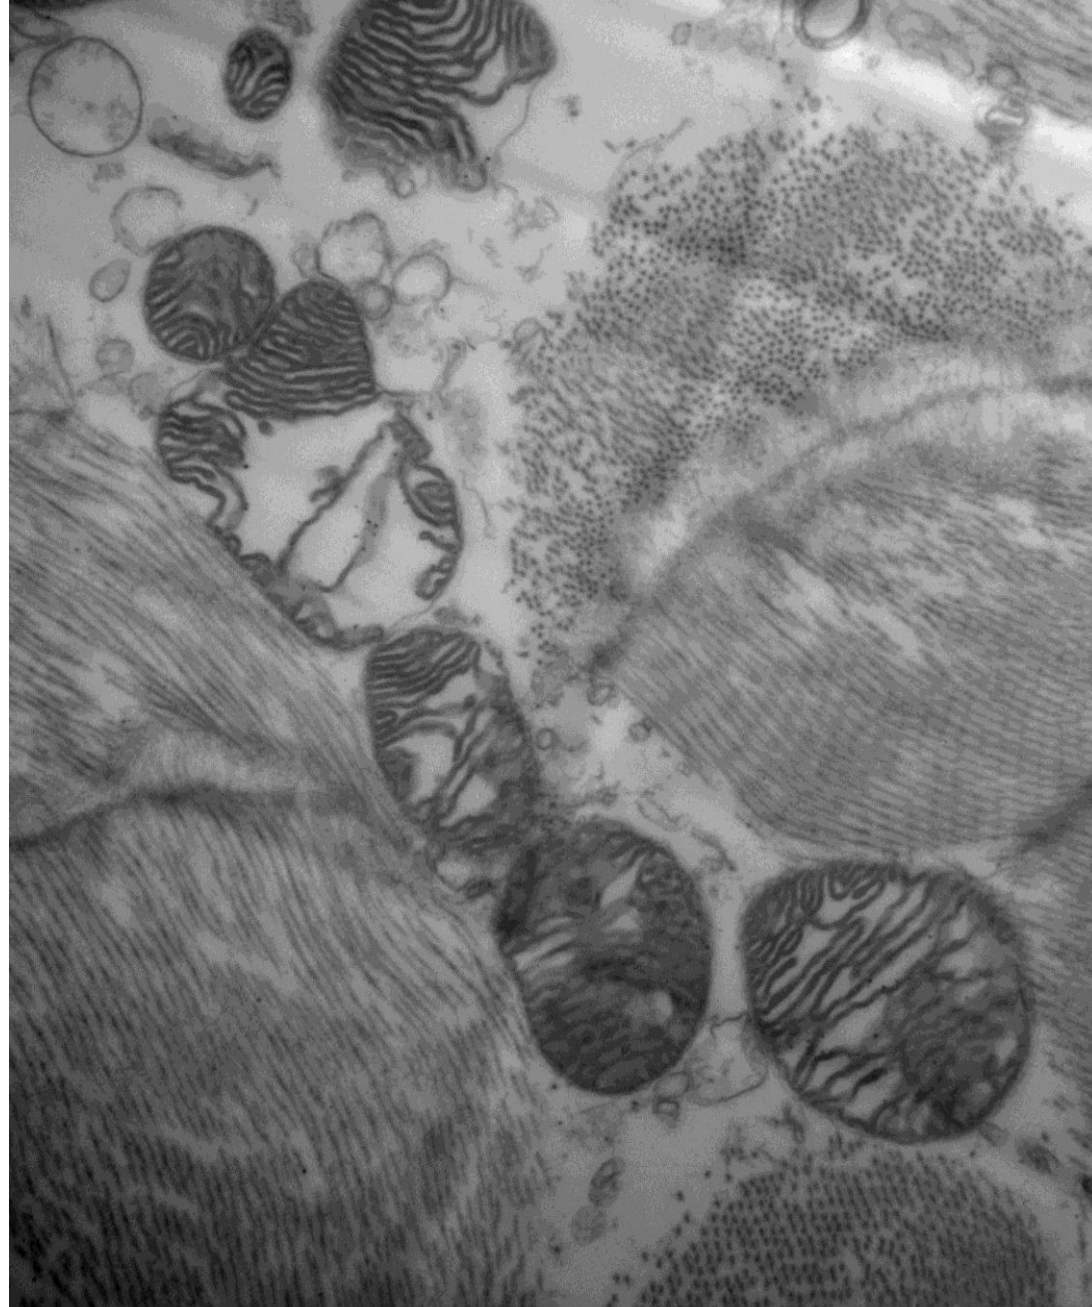

EFM1-grid3-b.tif  
Print Mag: 37x @ 7.0 in  
14:53 12/7/2018

|  
10  $\mu$ m  
HV=60kV  
Direct Mag: 18 x



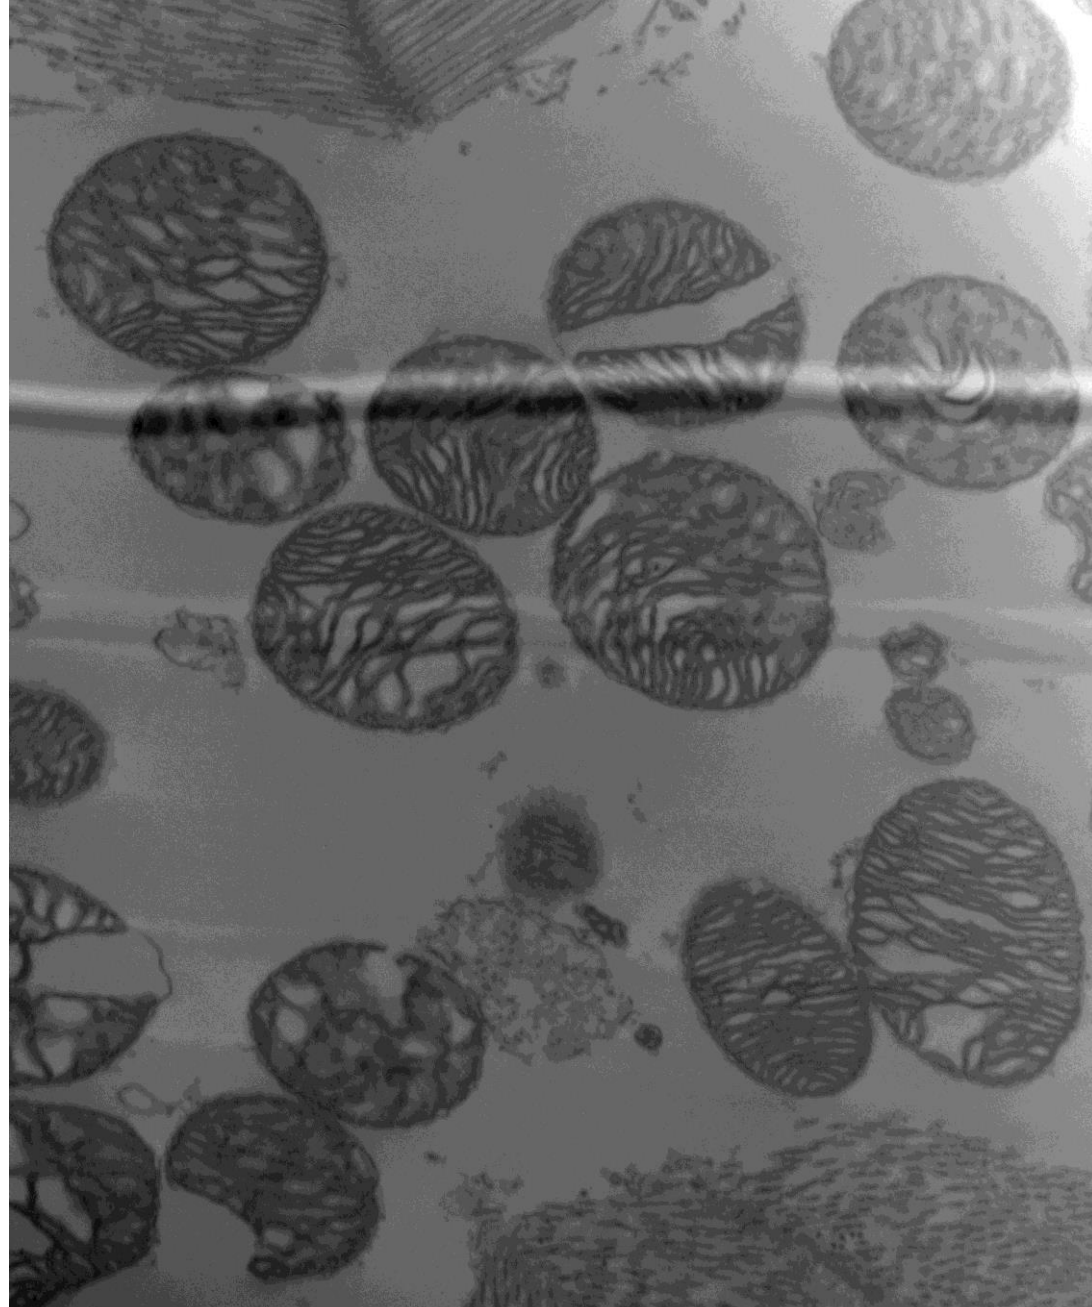

EFM1-grid2-i.tif  
Print Mag: 37x @ 7.0 in  
14:45 12/7/2018

|  
10  $\mu$ m  
HV=60kV  
Direct Mag: 18 x

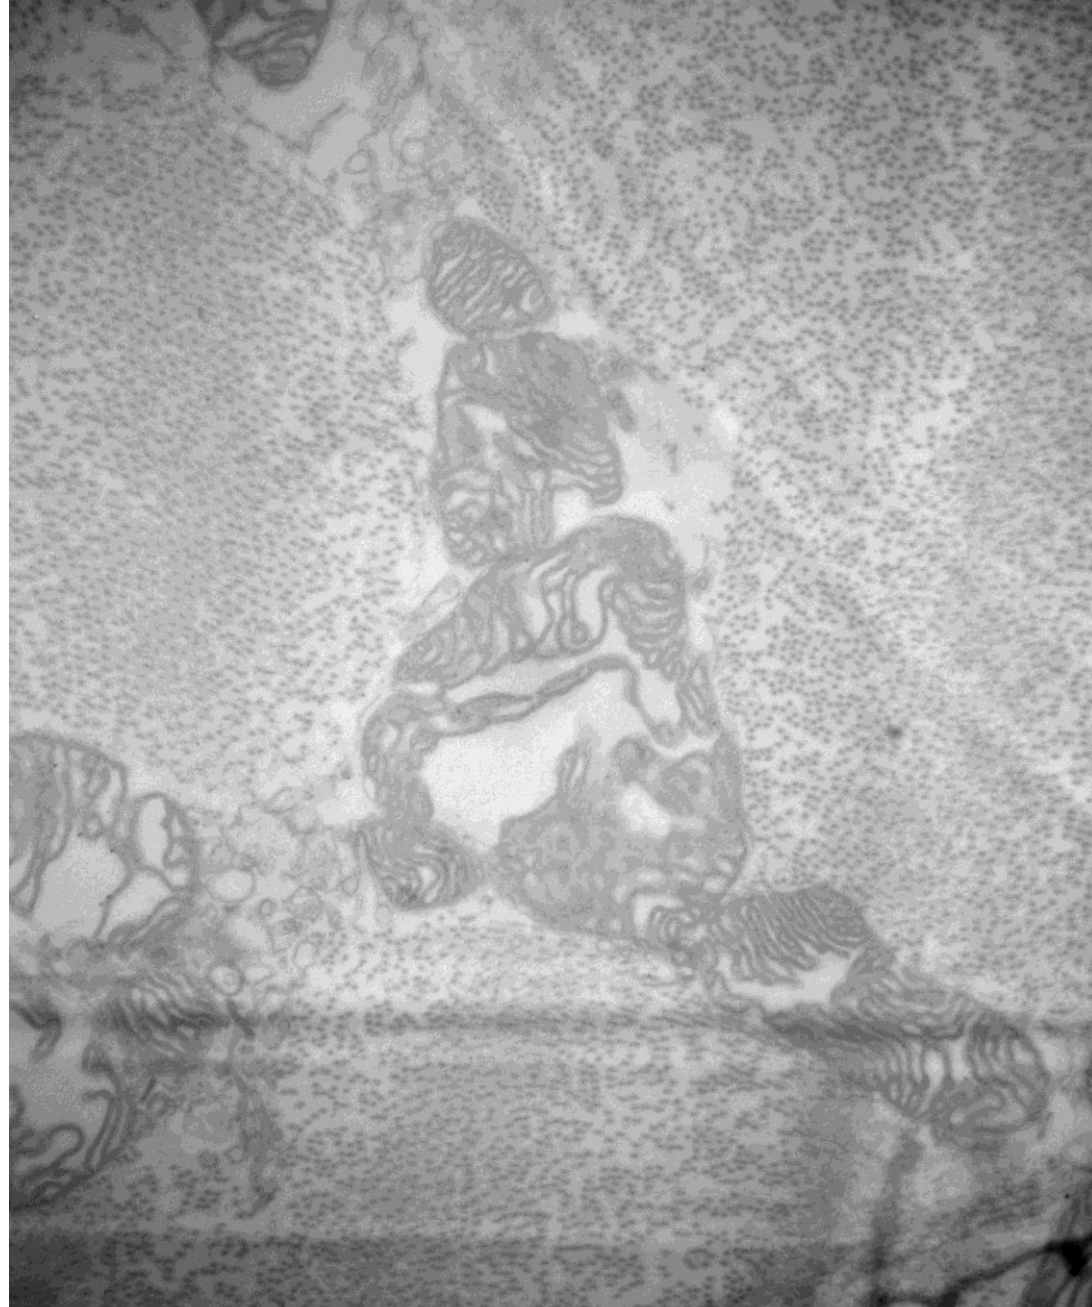

EFM1-grid1-b.tif  
Print Mag: 37x @ 7.0 in  
13:59 12/7/2018

10  $\mu$ m  
HV=60kV  
Direct Mag: 18 x

17 week 2 (emerged)

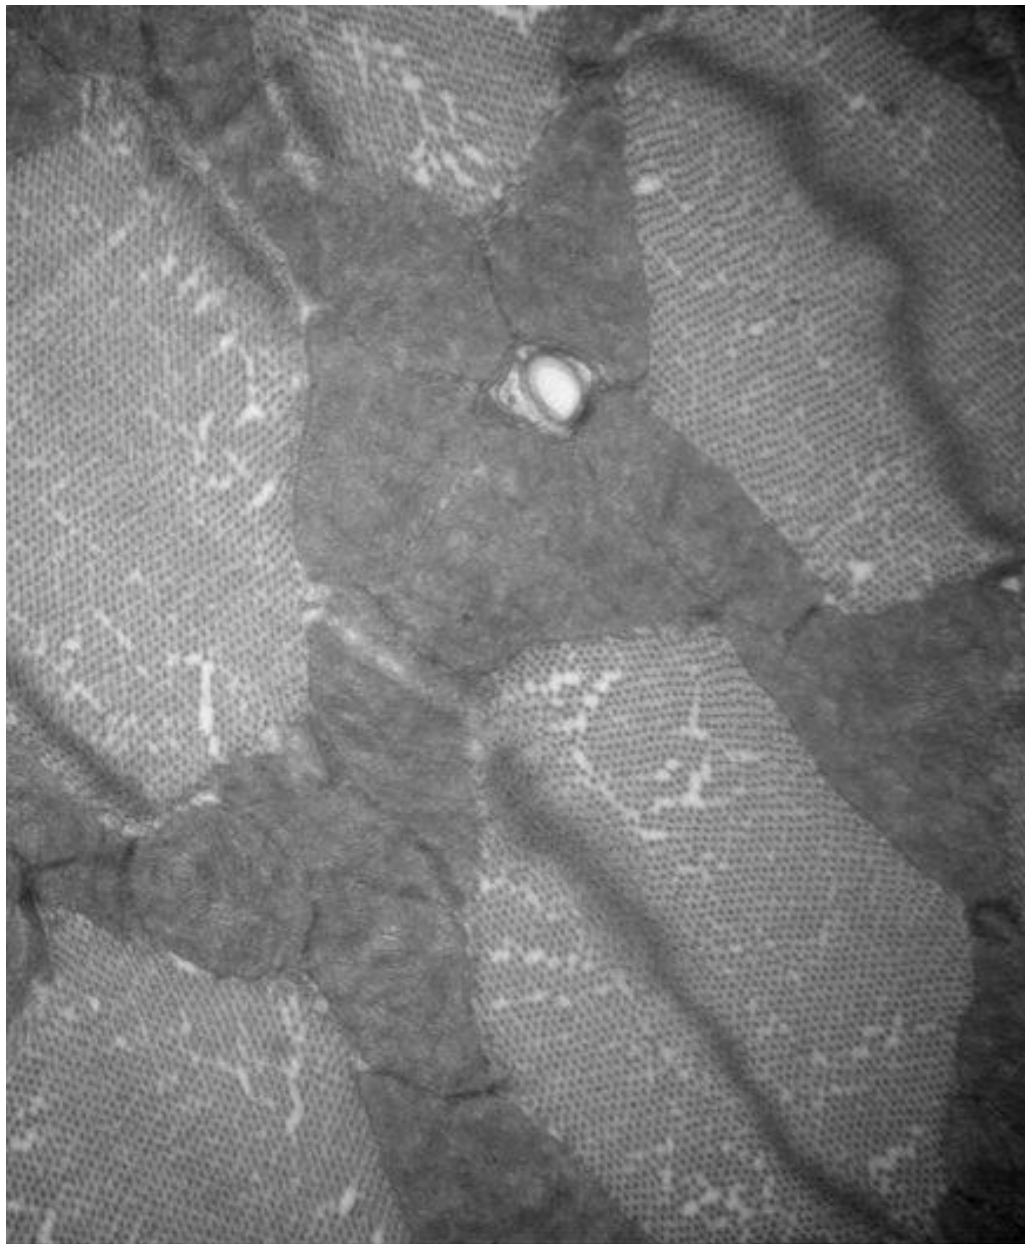

EFM2-grid1-a.tif  
BC-1-Grid1-V  
Print Mag: 21200x @ 7.0 in  
10:41 12/11/2018

1  $\mu$ m  
HV=60kV  
Direct Mag: 10500 x

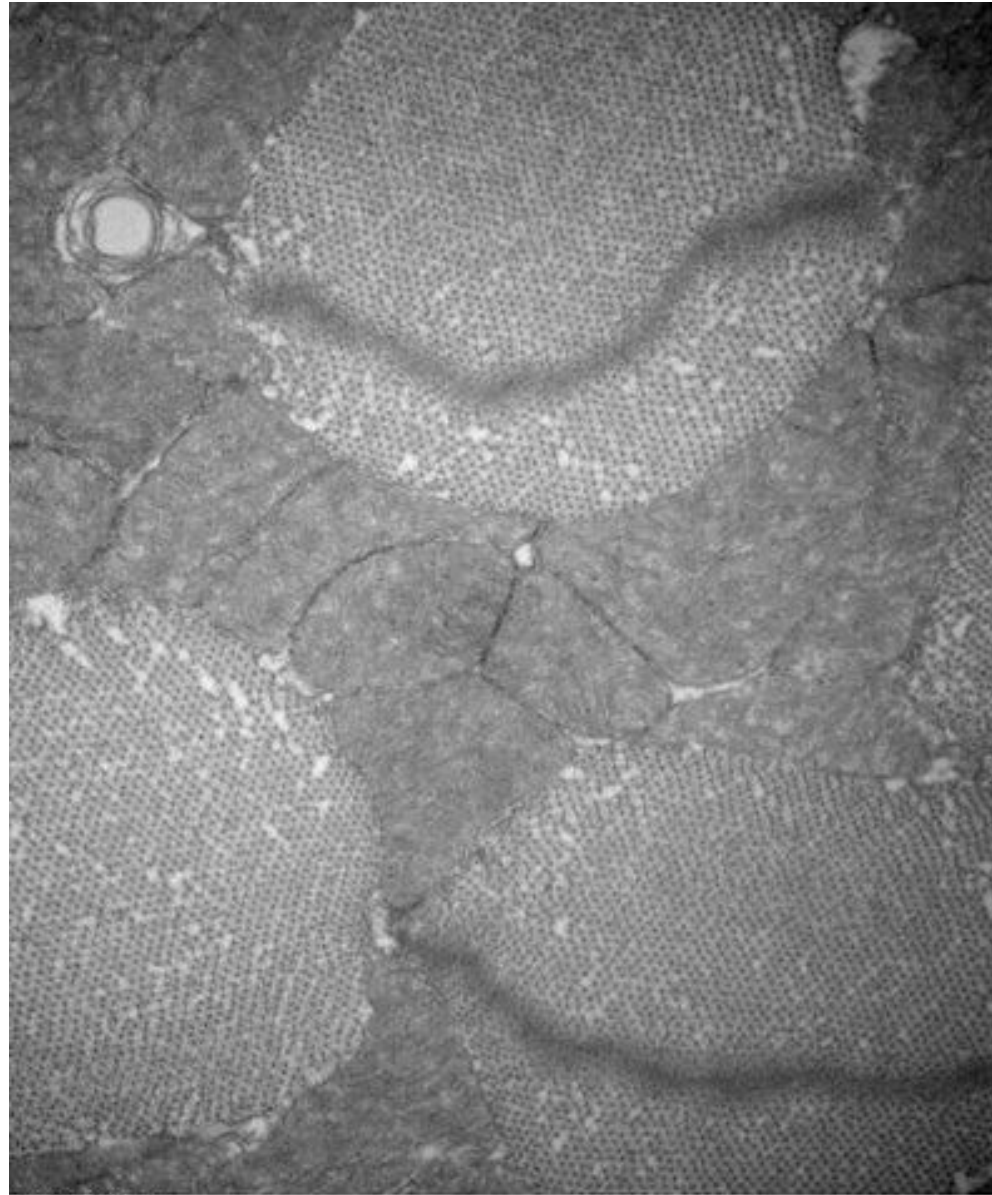

EFM2-grid2-a.tif  
BC-1-Grid1-V  
Print Mag: 21200x @ 7.0 in  
10:31 12/11/2018

1  $\mu$ m  
HV=60kV  
Direct Mag: 10500 x

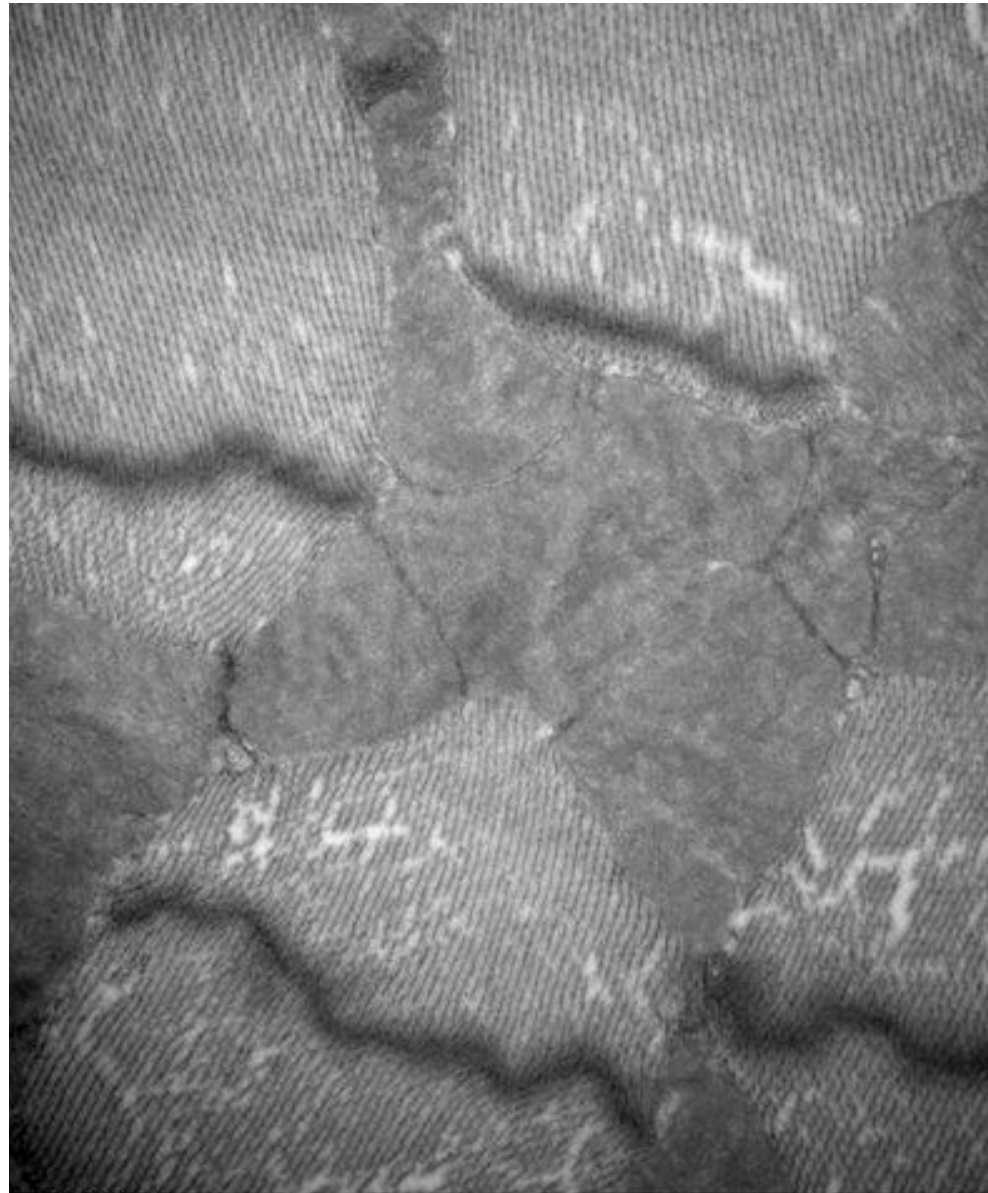

EFM2-grid3-c.tif  
BC-1-Grid1-V  
Print Mag: 21200x @ 7.0 in  
10:52 12/11/2018

1  $\mu$ m  
HV=60kV  
Direct Mag: 10500 x

17 week 3 (not emerged)

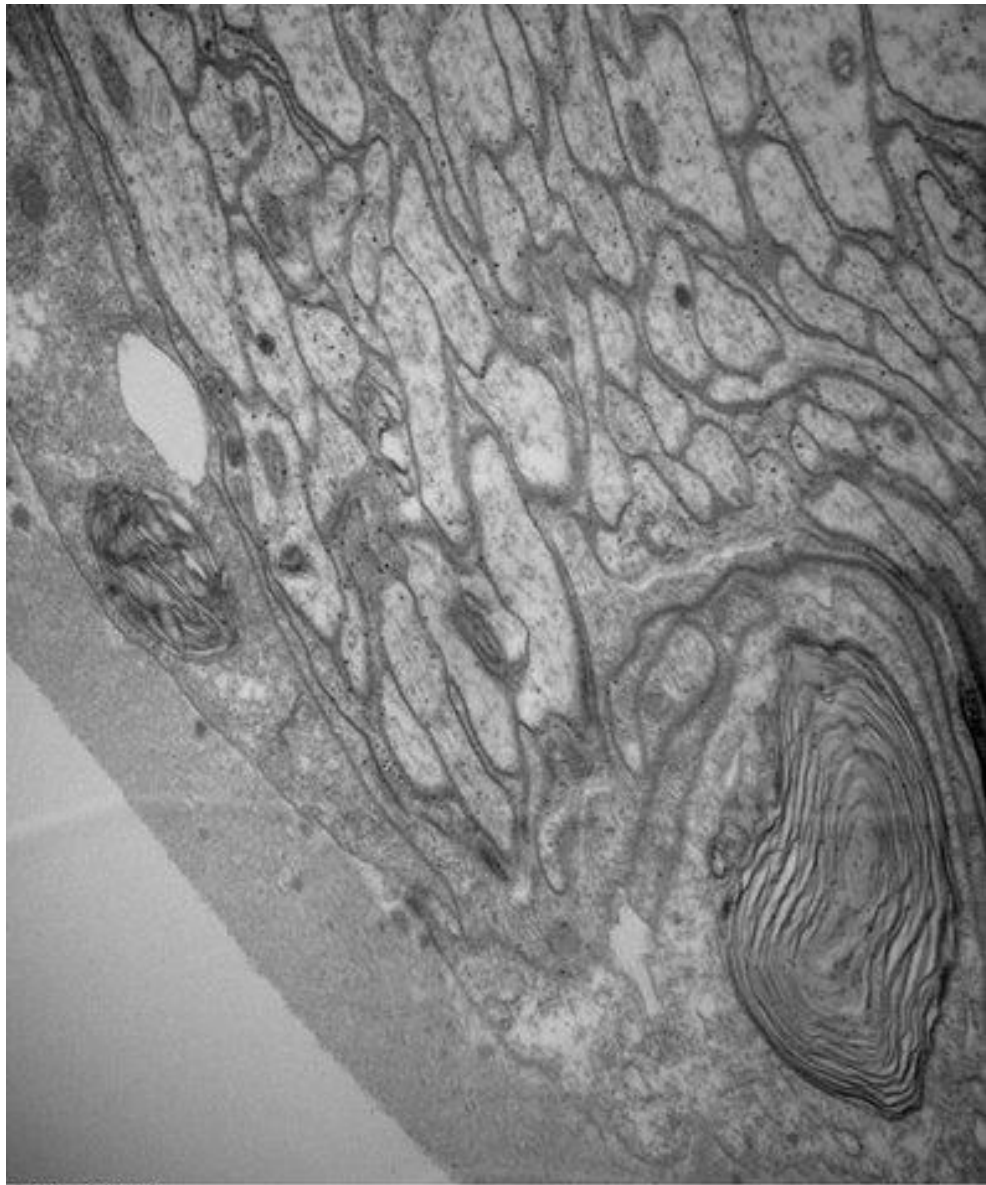

EFM3-grid3-e.tif  
BC-1-Grid1-V  
Print Mag: 21200x @ 7.0 in  
11:23 12/11/2018

1  $\mu$ m  
HV=60kV  
Direct Mag: 10500 x



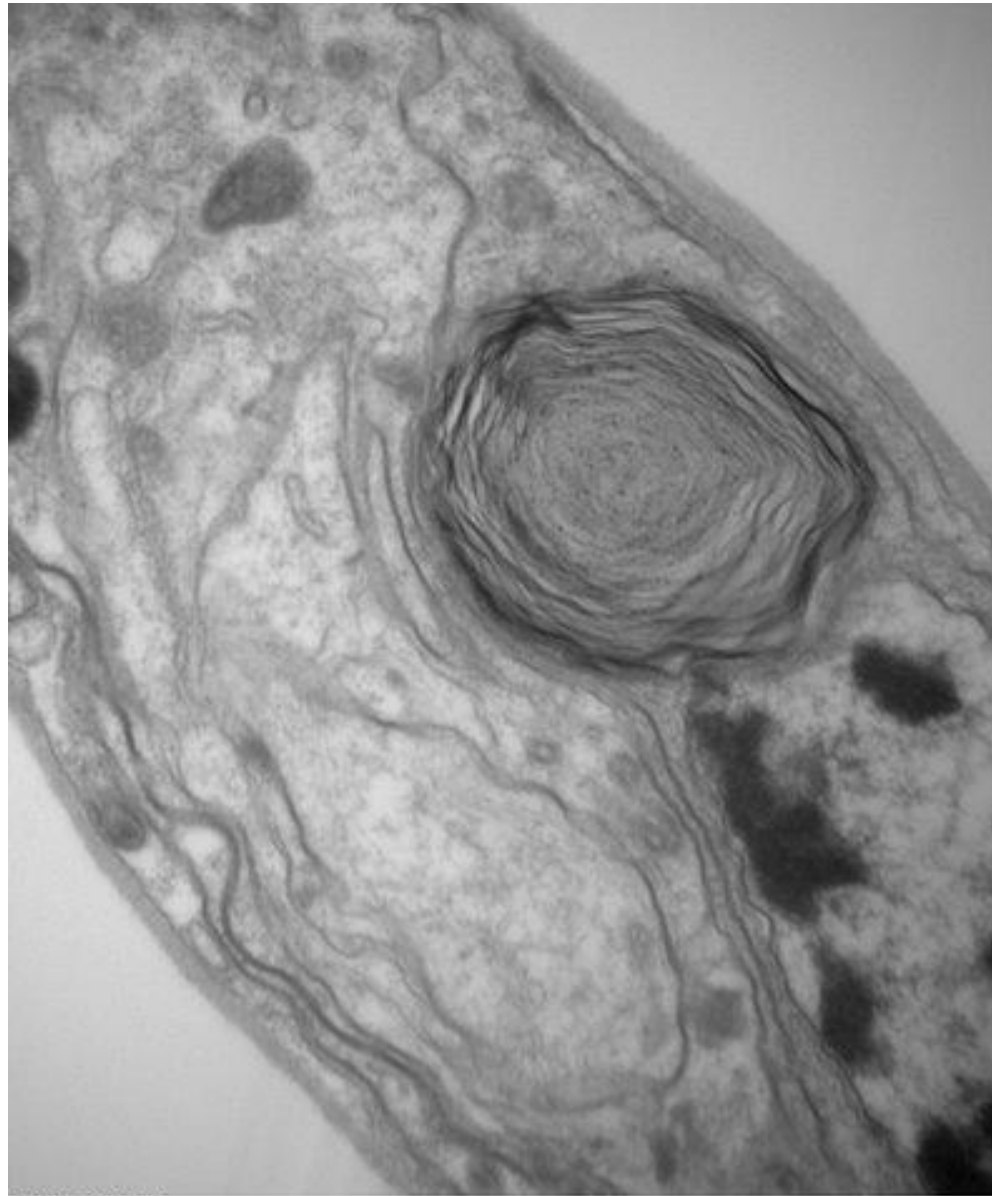

EFM3-grid5-a.tif  
BC-1-Grid1-V  
Print Mag: 21200x @ 7.0 in  
11:35 12/11/2018

1  $\mu$ m  
HV=60kV  
Direct Mag: 10500 x

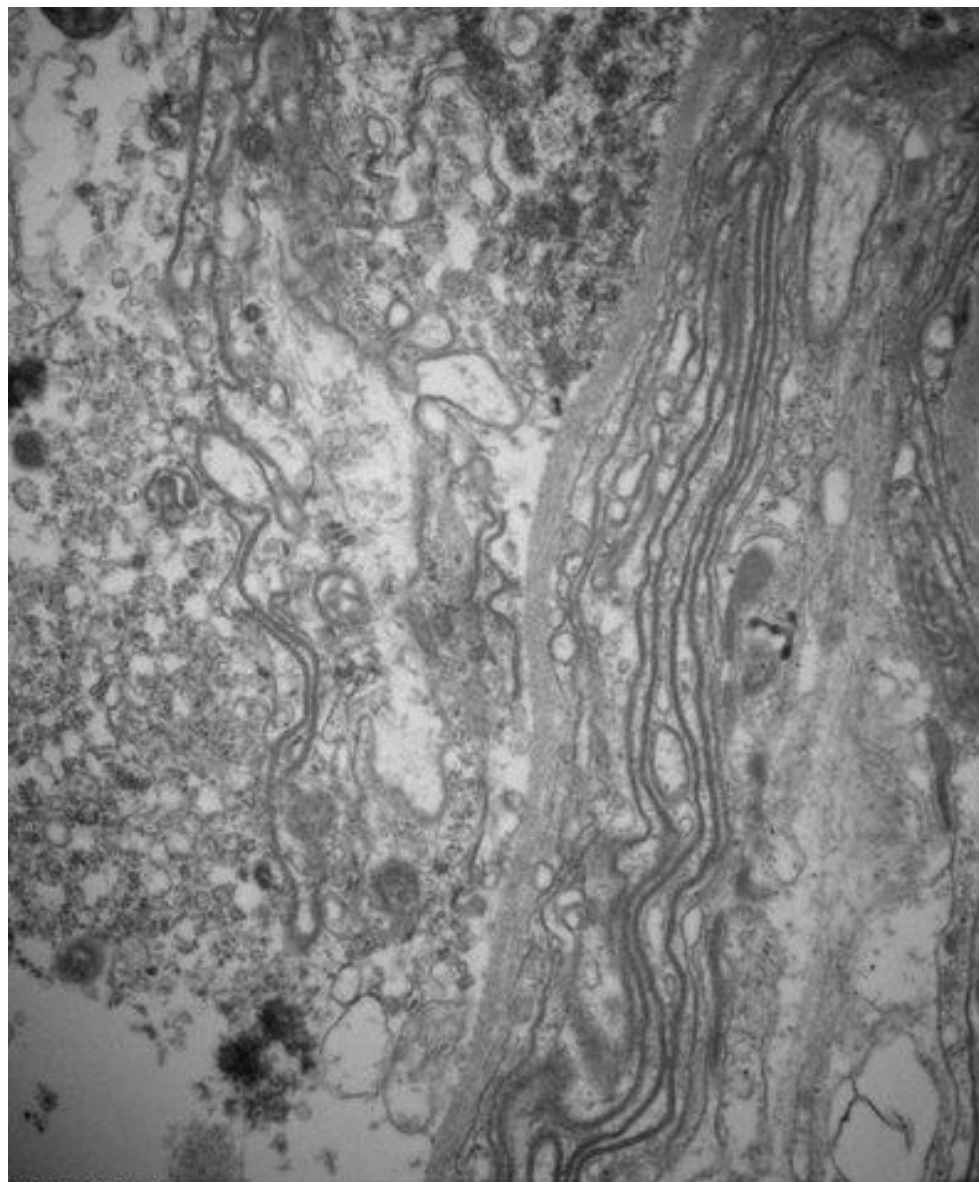

EFM3-grid3-c.tif  
BC-1-Grid1-V  
Print Mag: 21200x @ 7.0 in  
11:20 12/11/2018

1  $\mu$ m  
HV=60kV  
Direct Mag: 10500 x
